# Supplementary material for: Genome-Wide Survey and Expression Analysis of the Putative Non-Specific Lipid Transfer Proteins in Brassica rapa L
Source: PubMed Central journal article supplement (PMC3908880; doi:10.1371/journal.pone.0084556), 2014-01-31
Supplement: pone.0084556.s001.pdf [file pone.0084556.s001.pdf]

**Figure S1.** Three-dimensional structures of the mature BrnsLtp proteins predicted by Phyre<sup>2</sup>

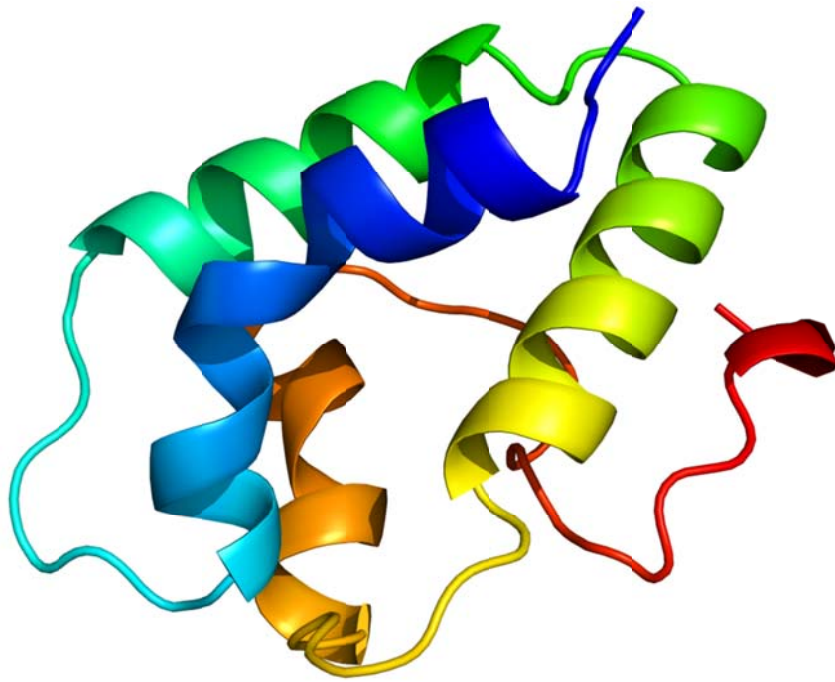

**BrnsLtpI.1**

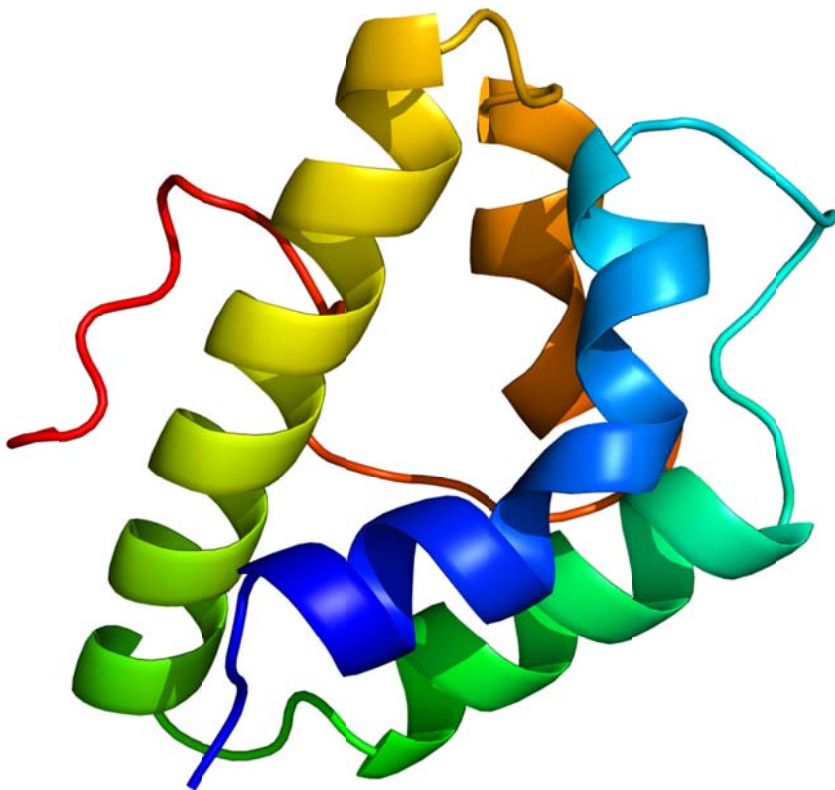

**BrnsLtpI.2**

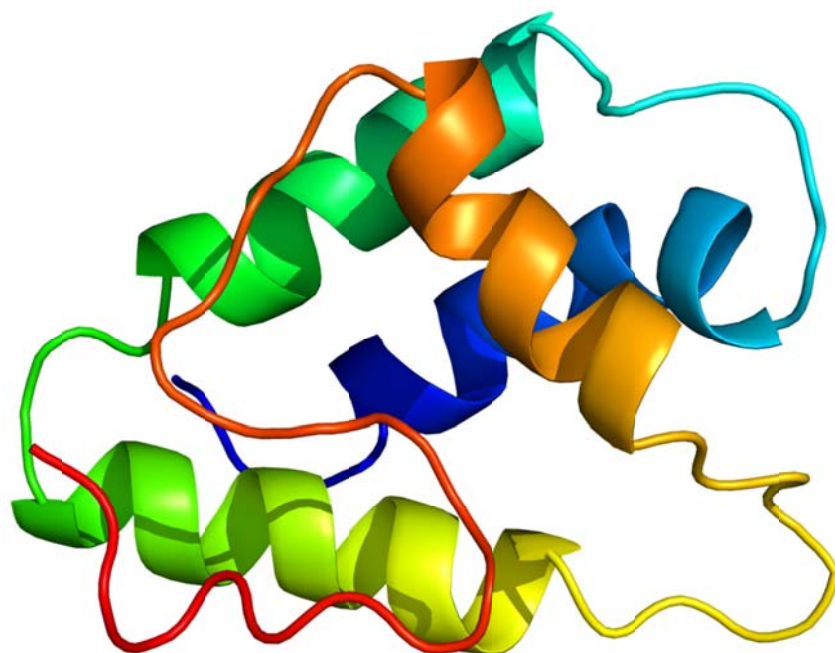

**BrnsLtpI.3**

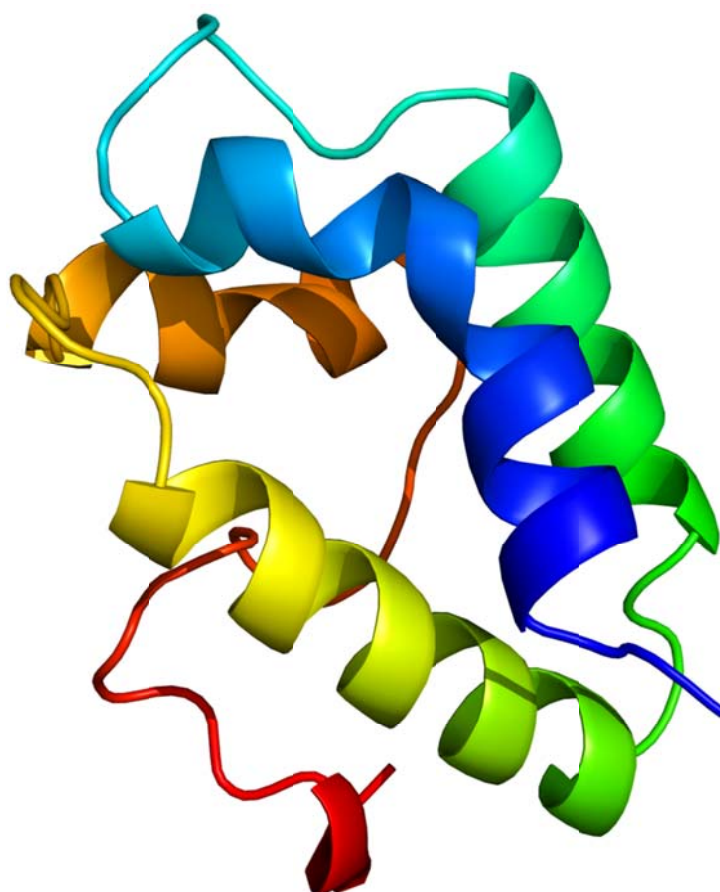

**BrnsLtpI.4**

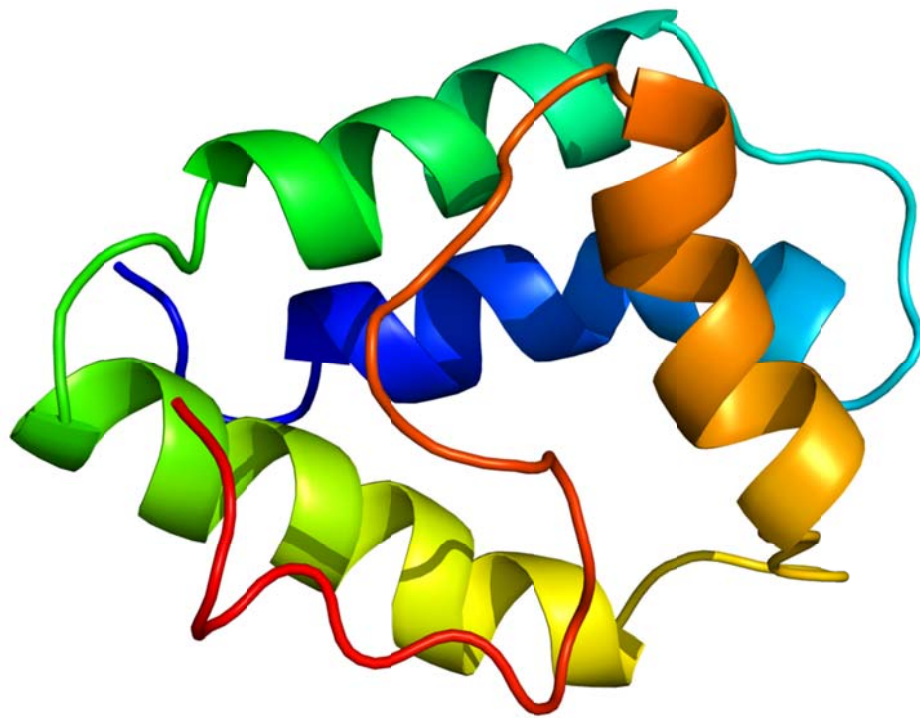

**BrnsLtpI.5**

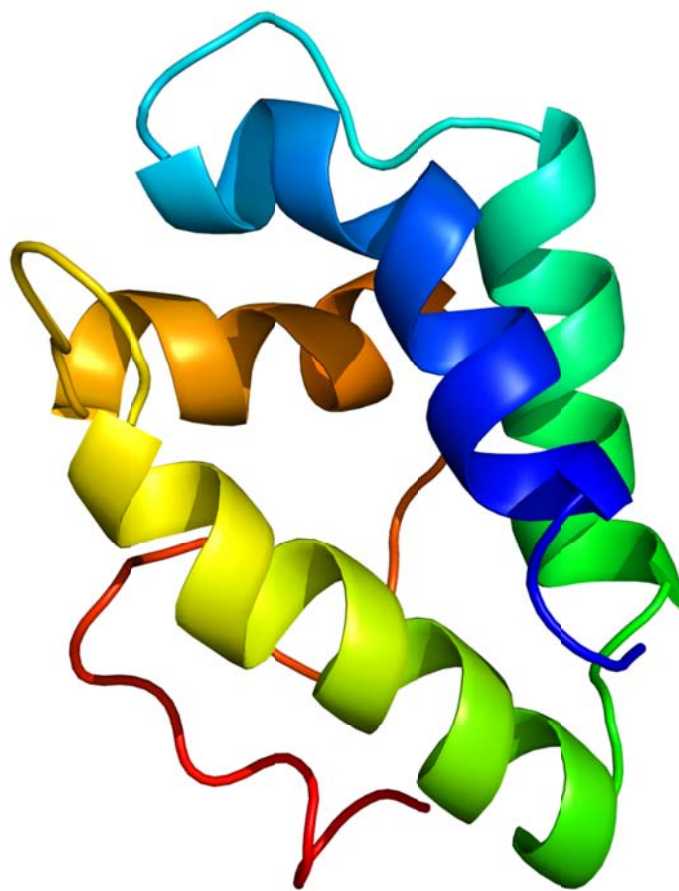

**BrnsLtpI.6**

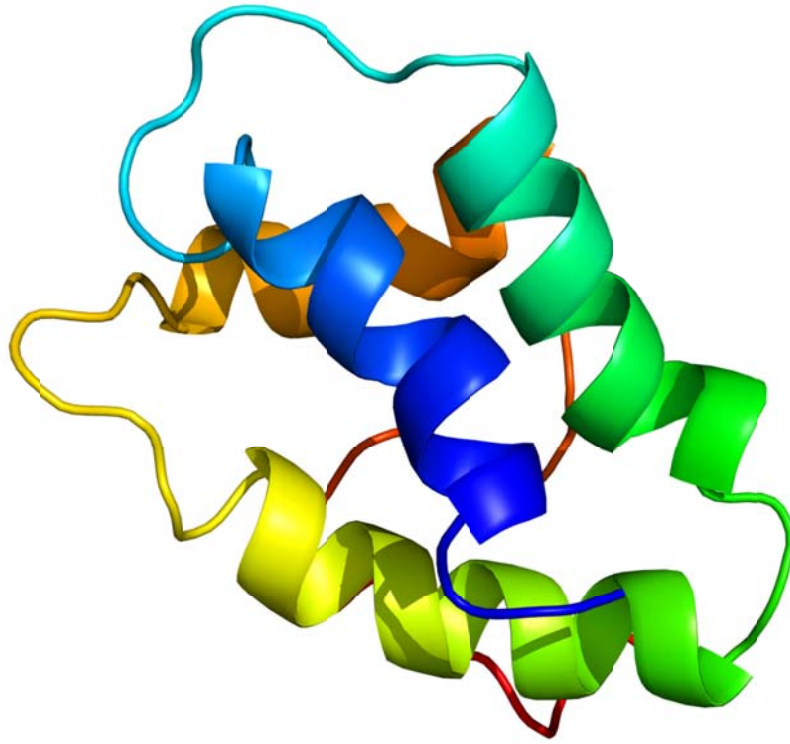

**BrnsLtpI.7**

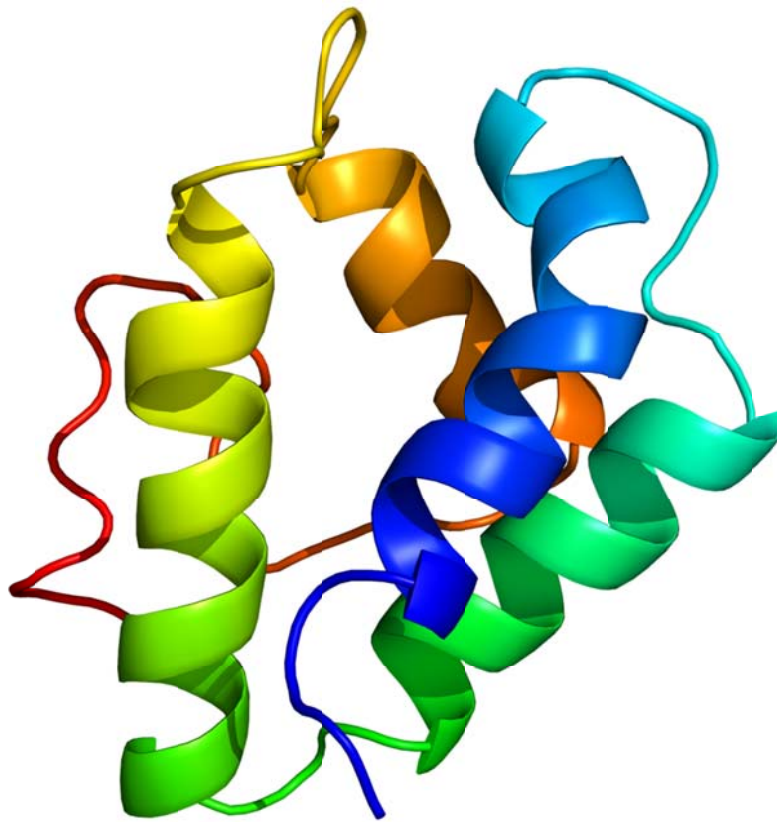

**BrnsLtpI.8**

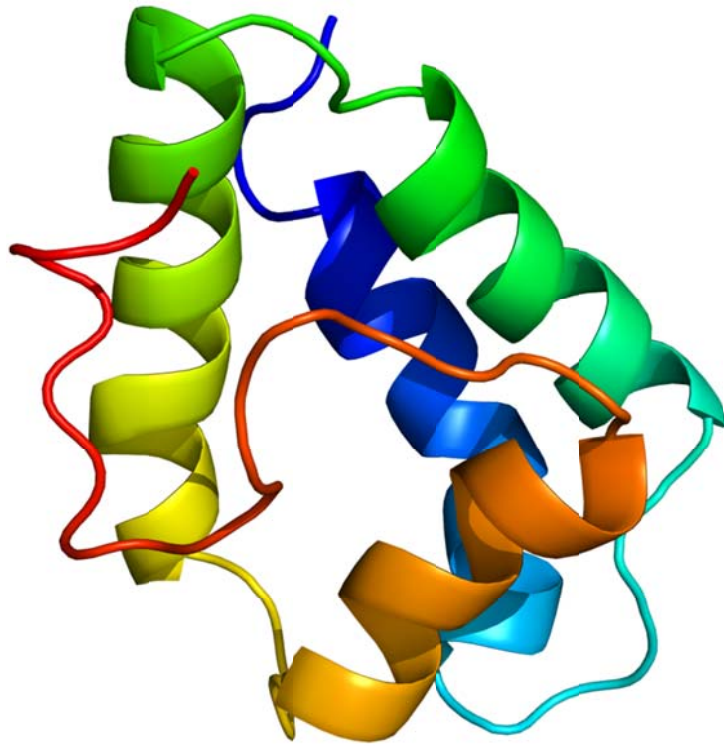

**BrnsLtpI.9**

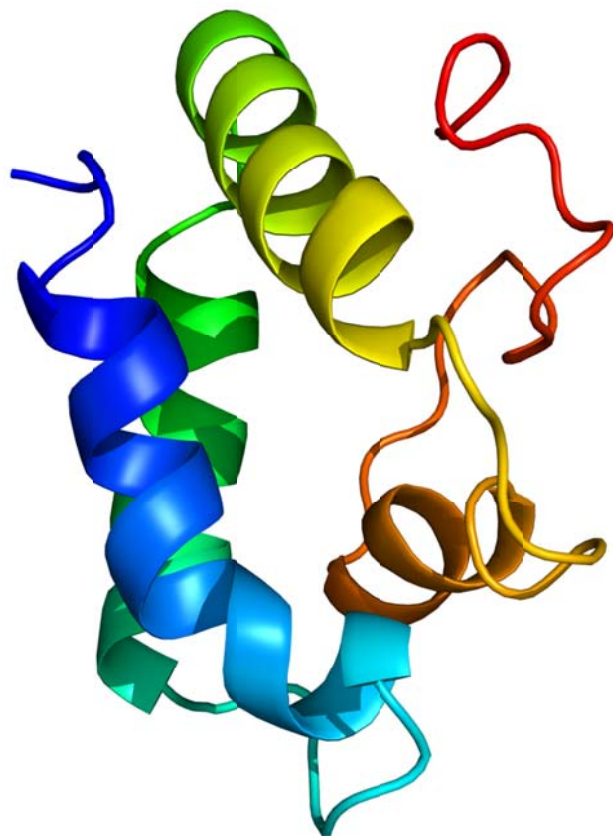

**BrnsLtpI.10**

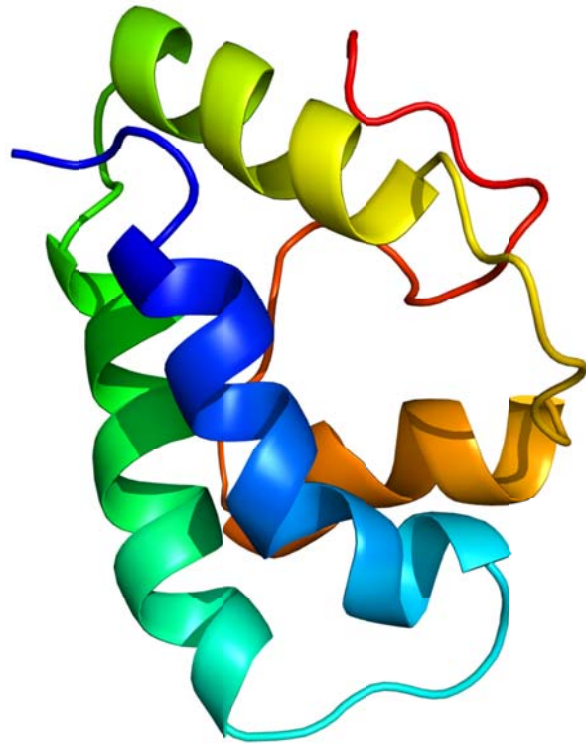

**BrnsLtpI.11**

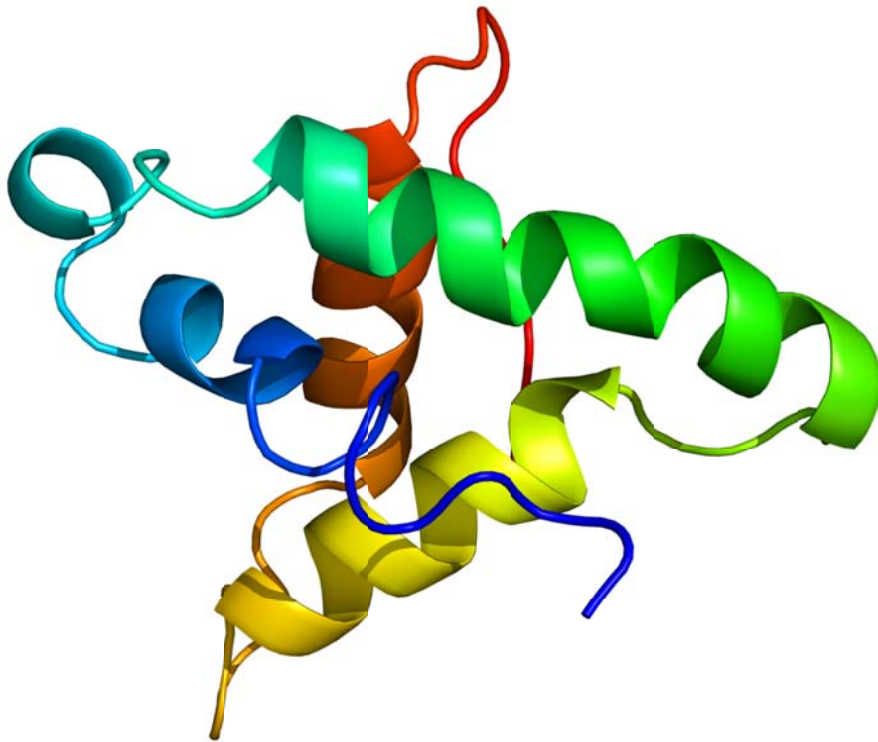

**BrnsLtpI.12**

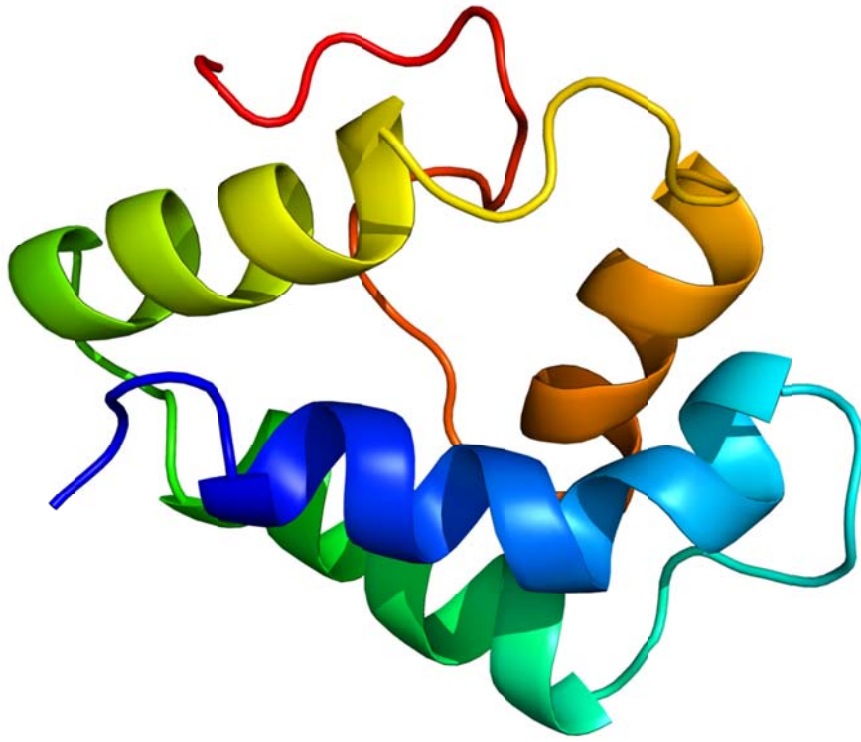

**BrnsLtpI.13**

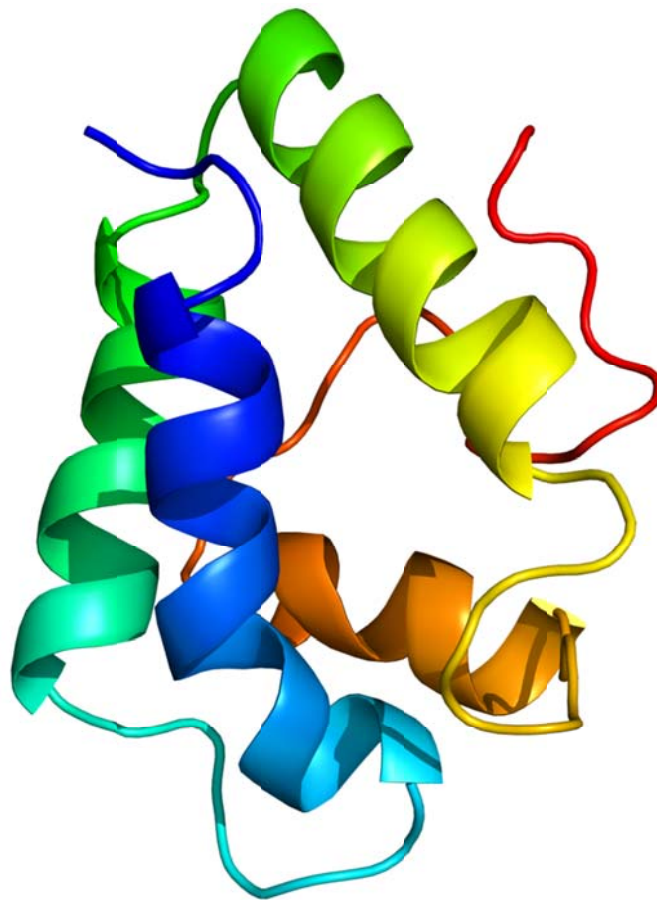

**BrnsLtpI.14**

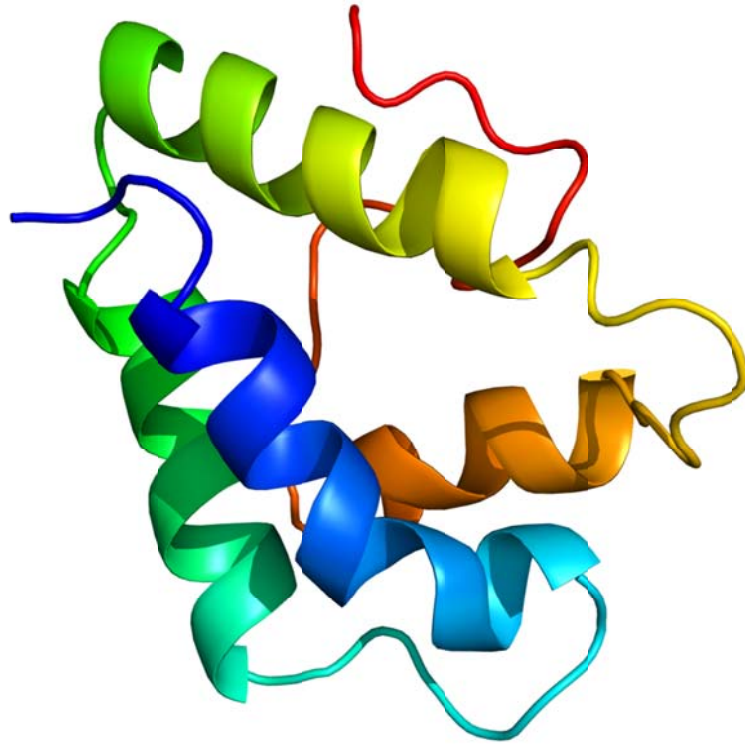

**BrnsLtpI.15**

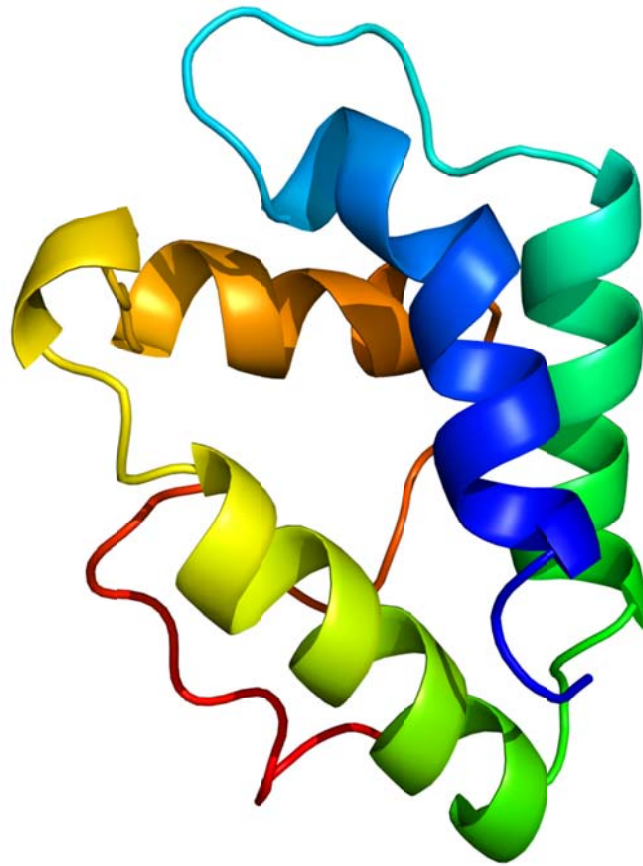

**BrnsLtpI.16**



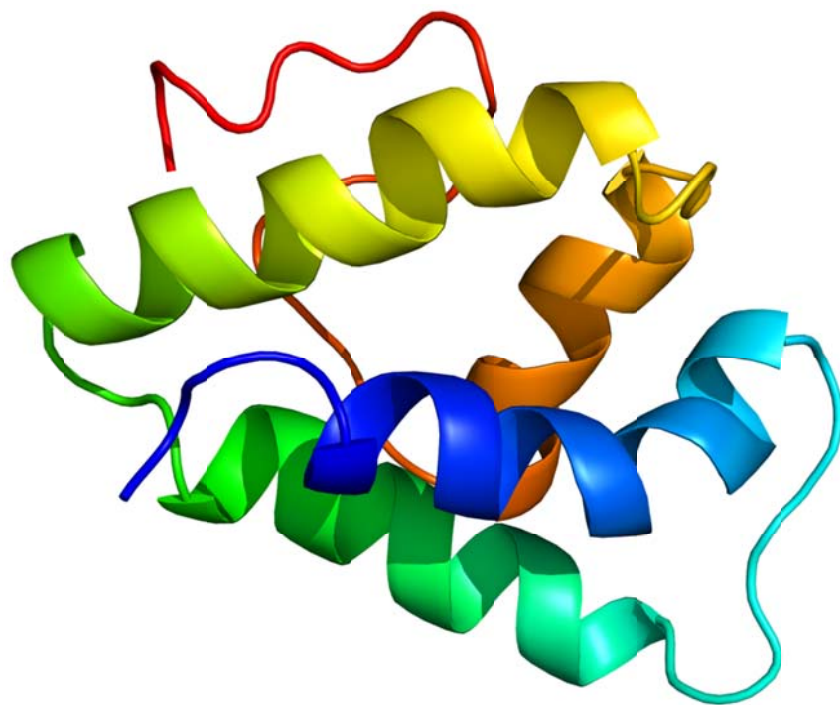

**BrnsLtpI.17**

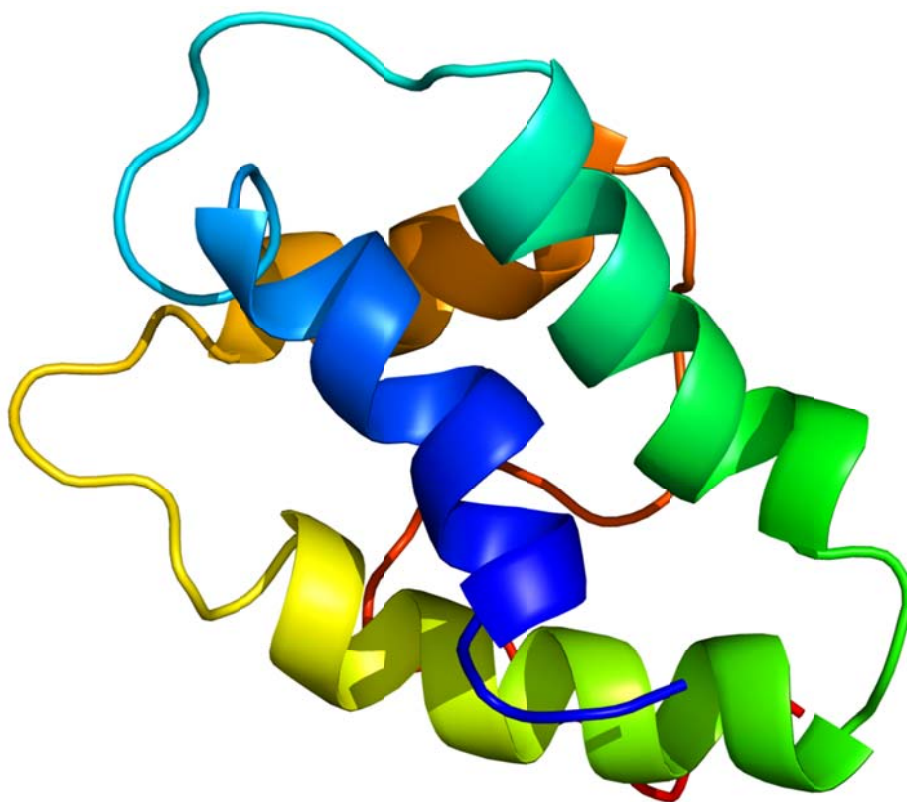

**BrnsLtpI.18**

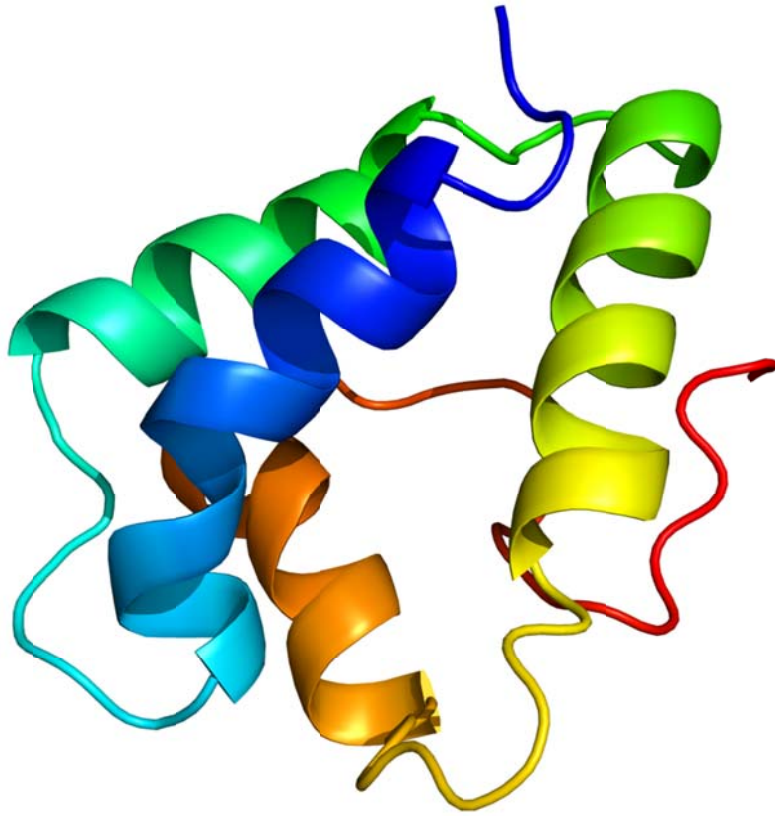

**BrnsLtpI.19**

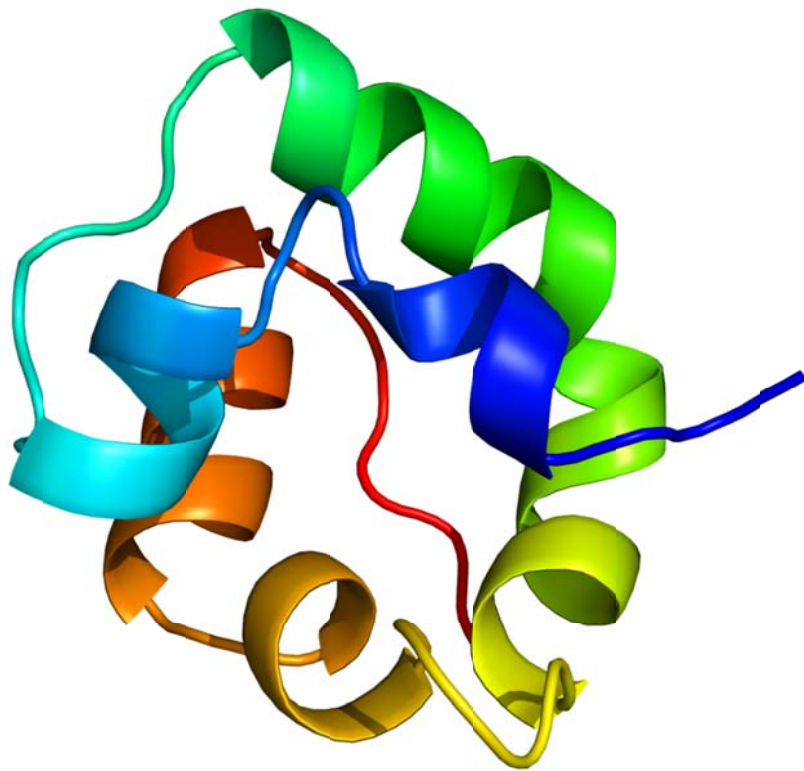

**BrnsLtpII.1**

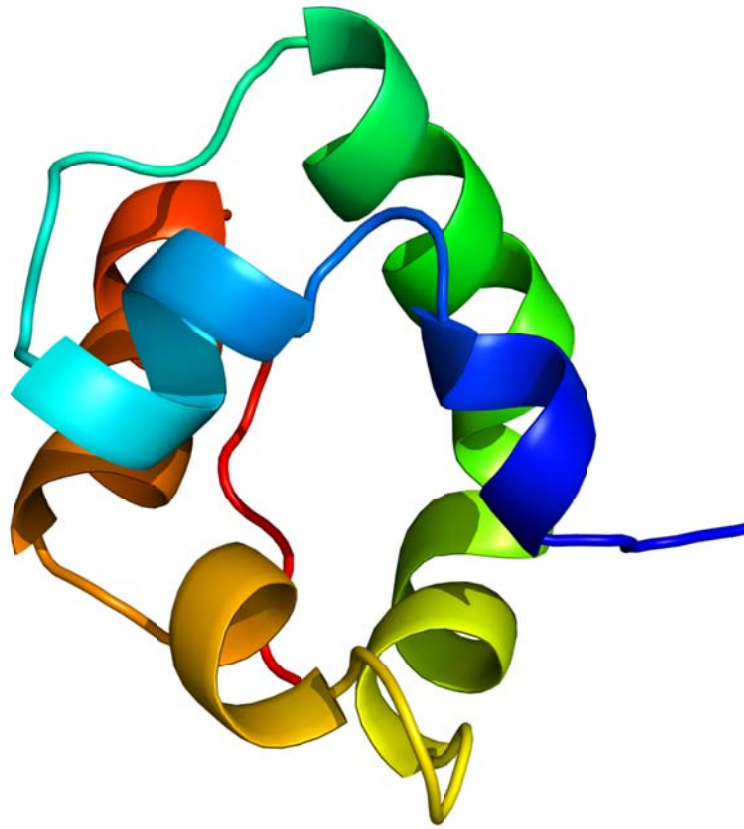

**BrnsLtpII.2**

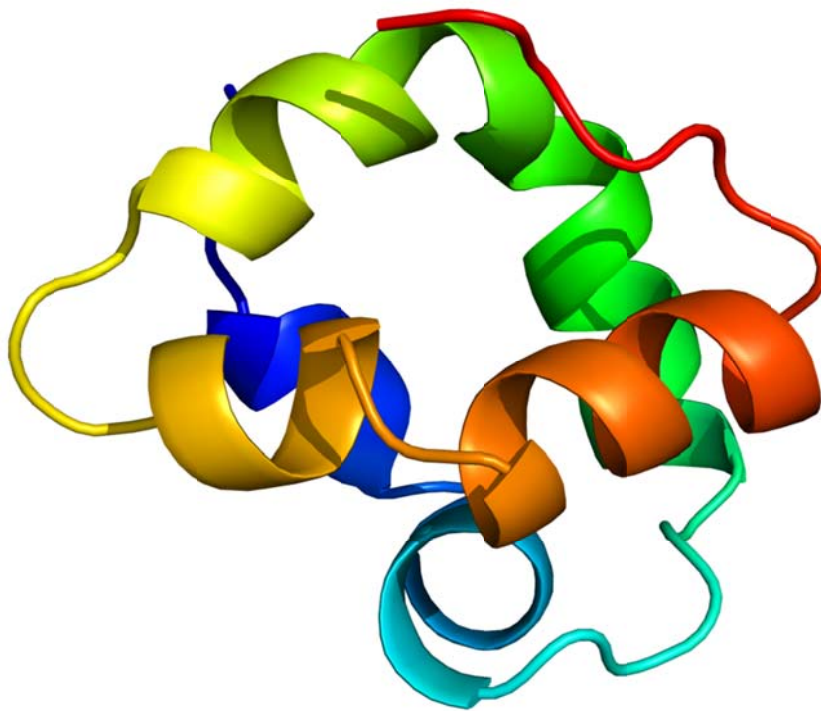

**BrnsLtpII.3**

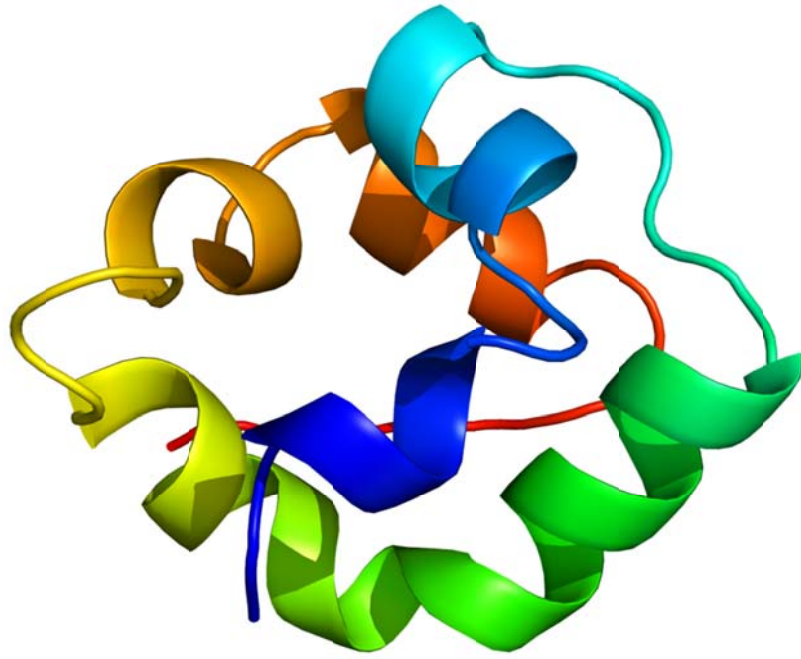

**BrnsLtpII.4**

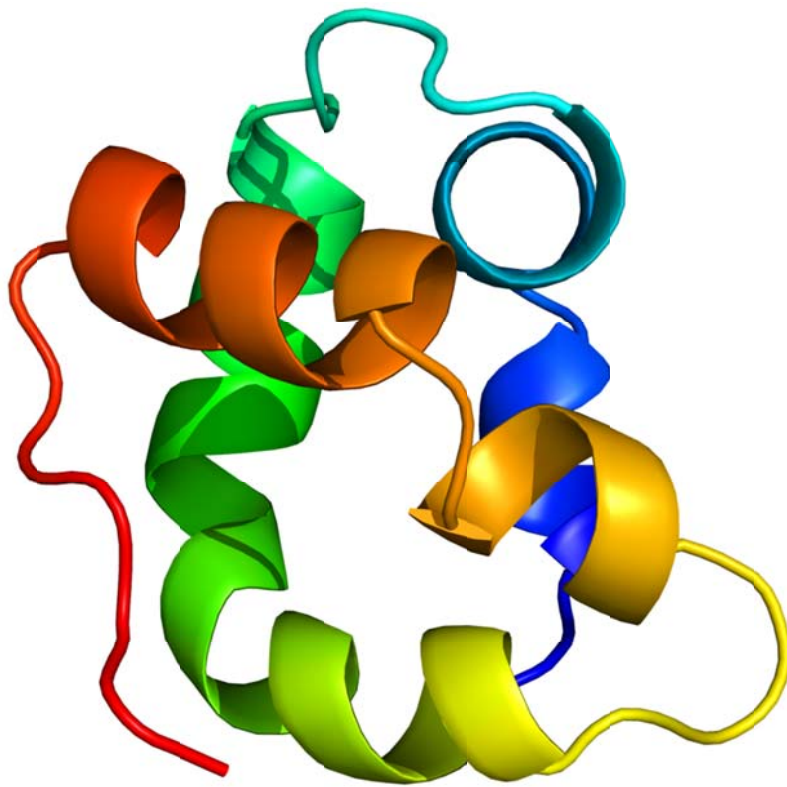

**BrnsLtpII.5**

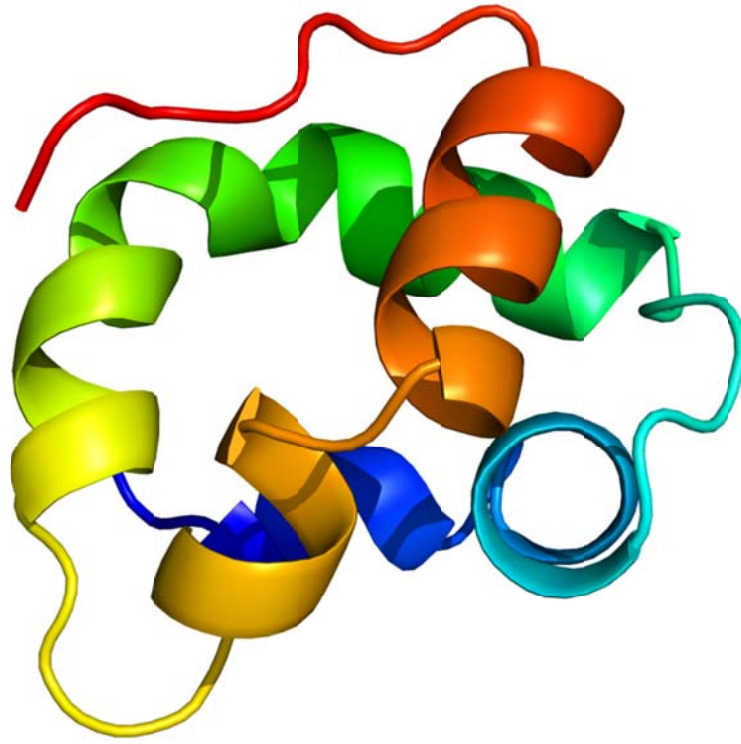

**BrnsLtpII.6**

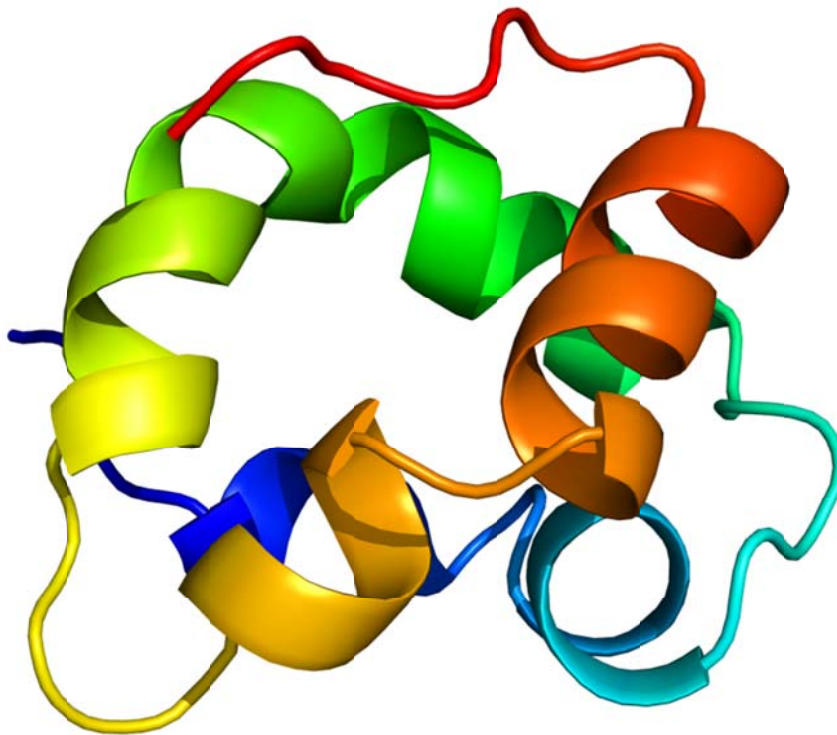

**BrnsLtpII.7**

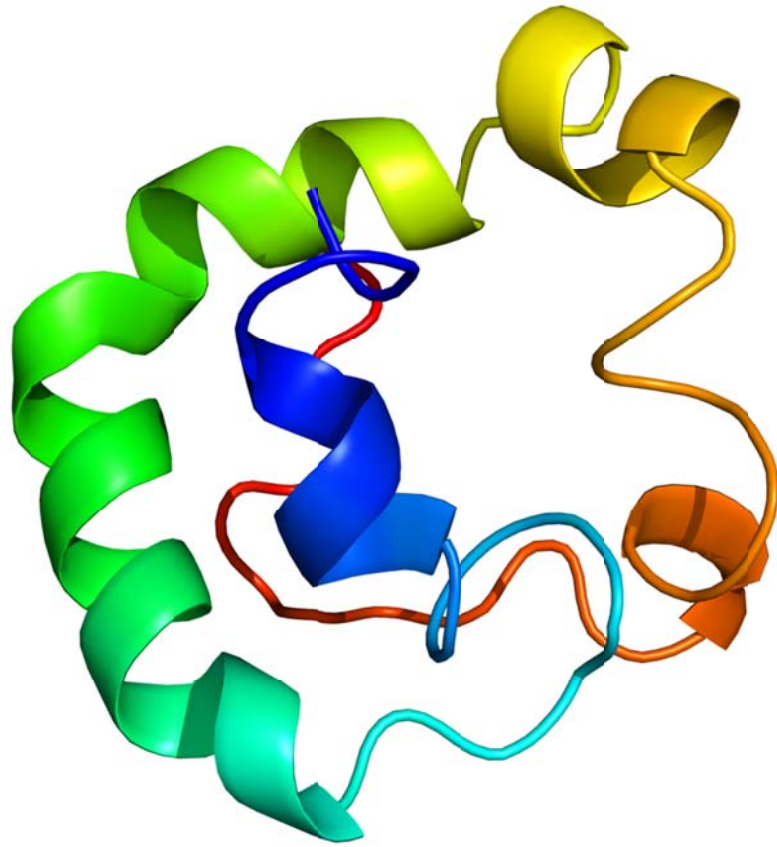

**BrnsLtpII.8**

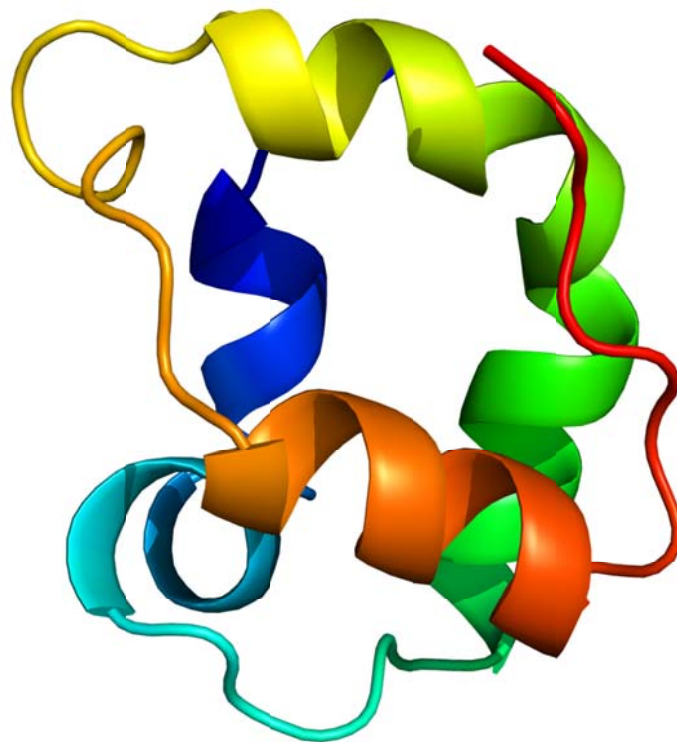

**BrnsLtpII.9**

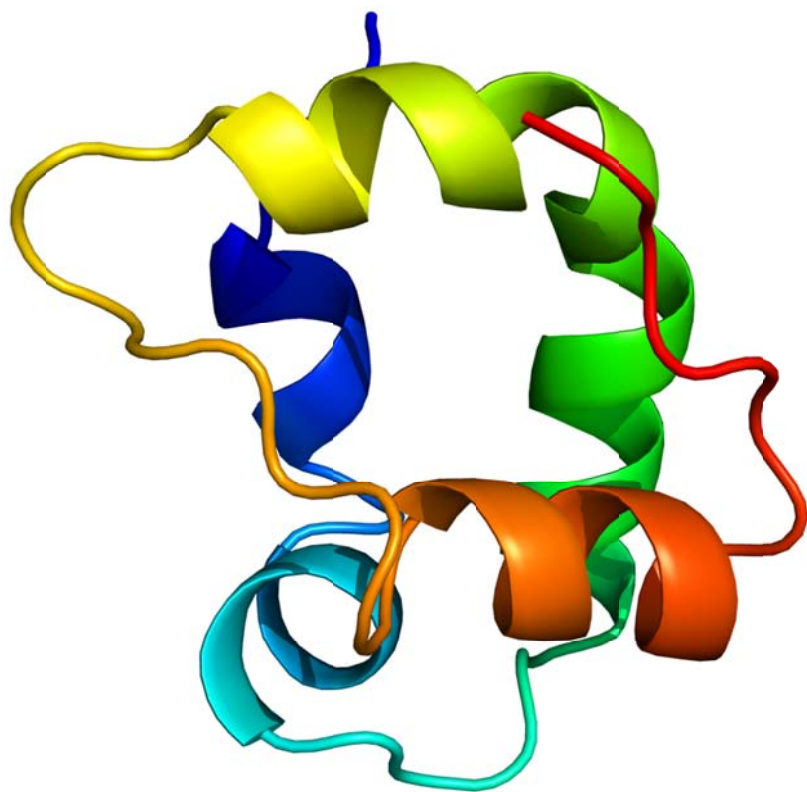

**BrnsLtpII.10**

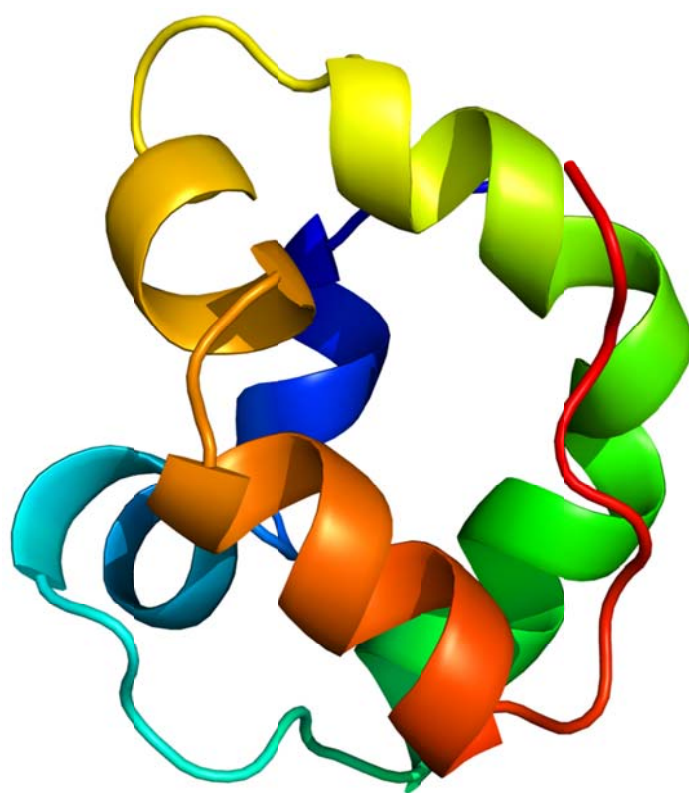

**BrnsLtpII.11**

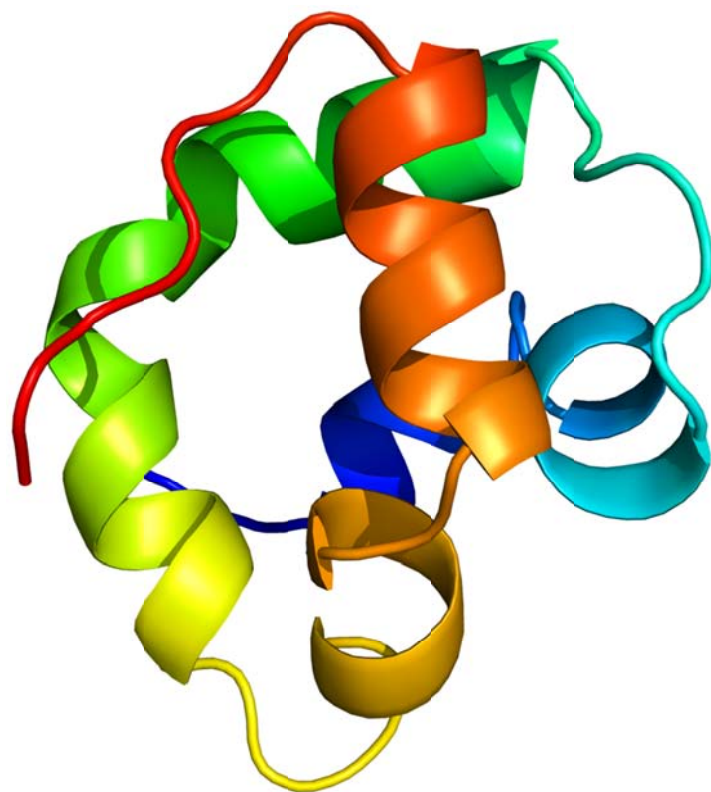

**BrnsLtpII.12**

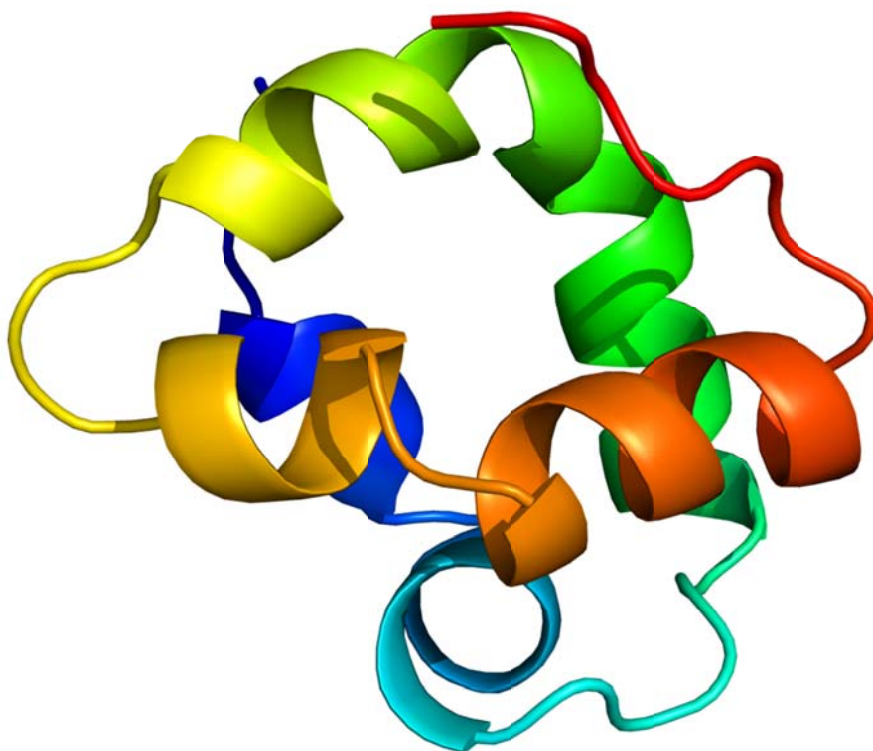

**BrnsLtpII.13**



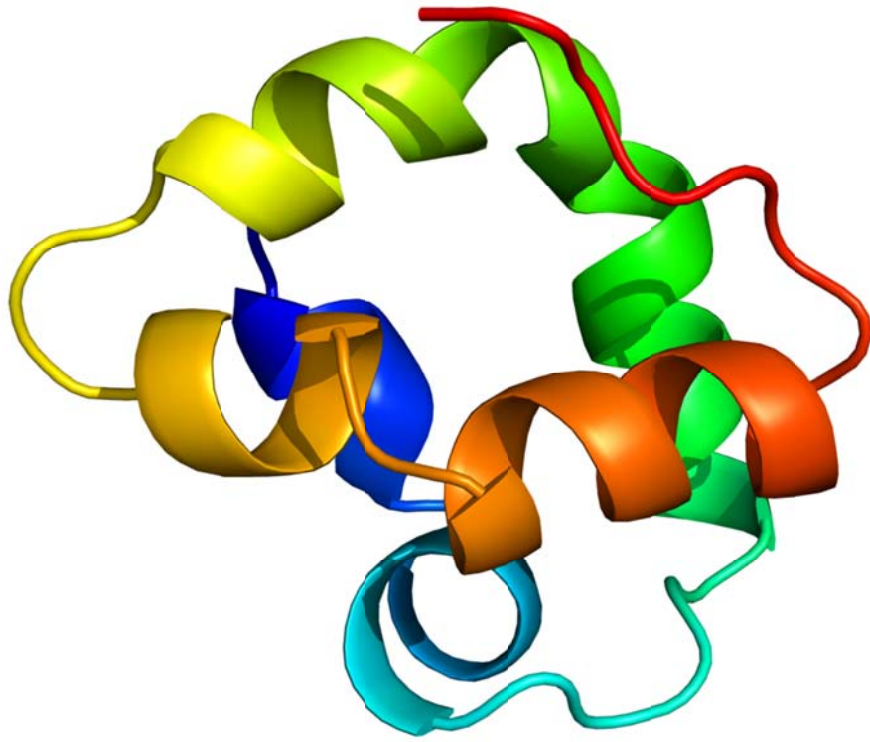

**BrnsLtpII.14**

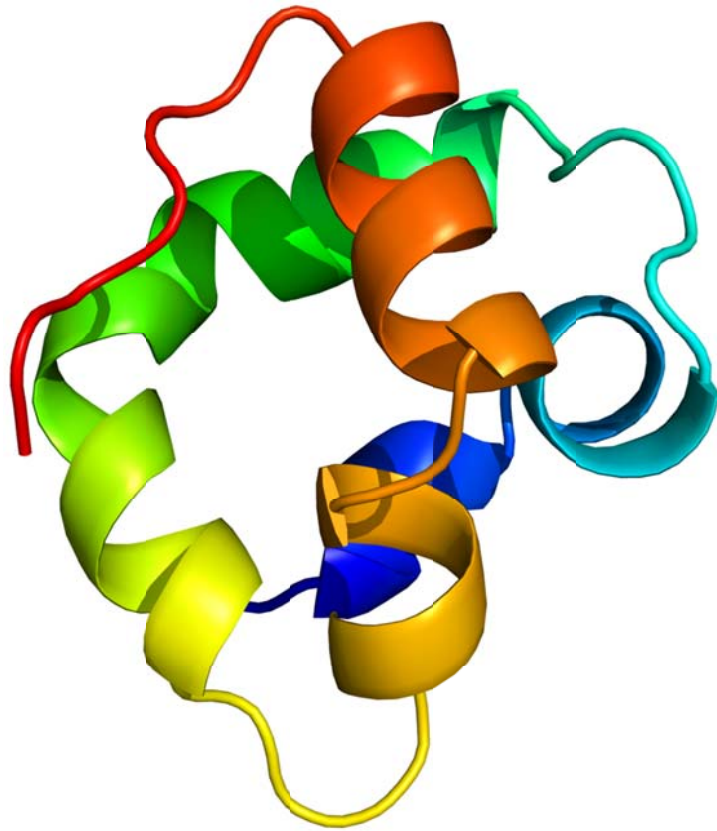

**BrnsLtpII.15**

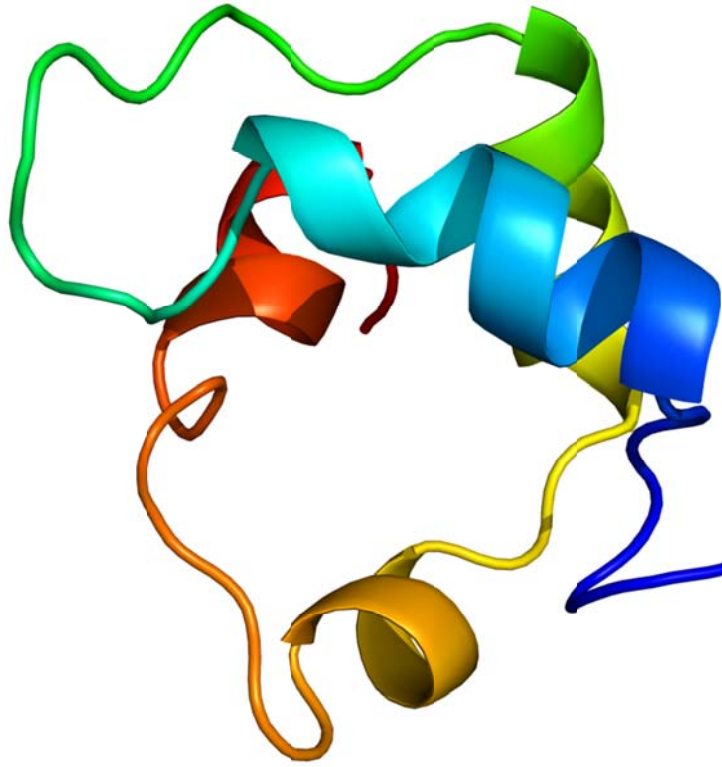

**BrnsLtpIII.1**

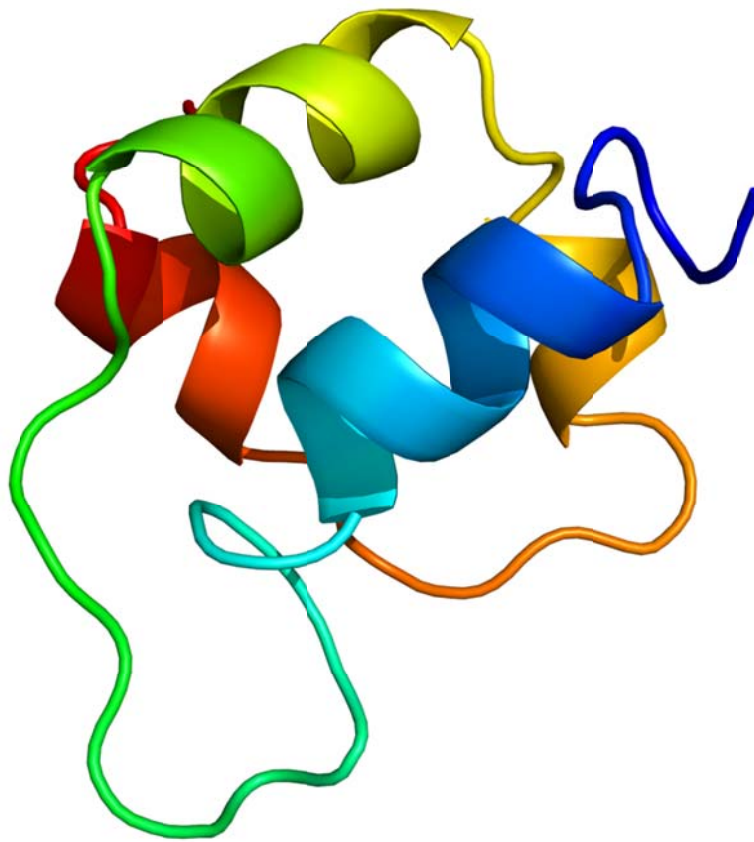

**BrnsLtpIII.2**

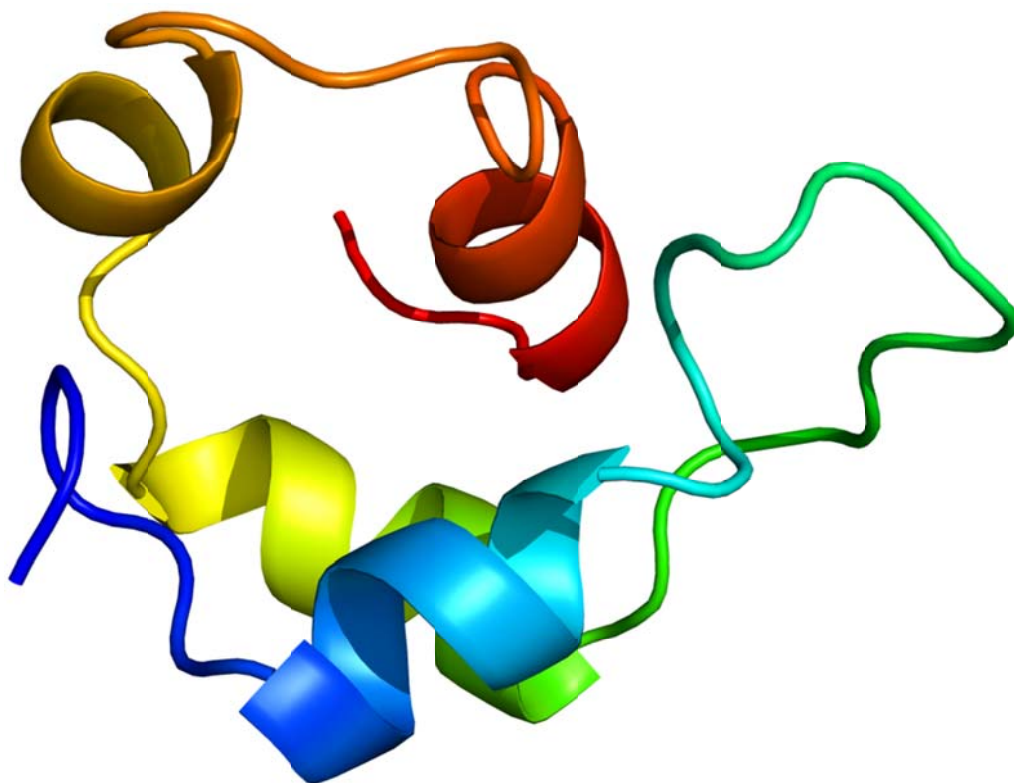

**BrnsLtpIII.3**

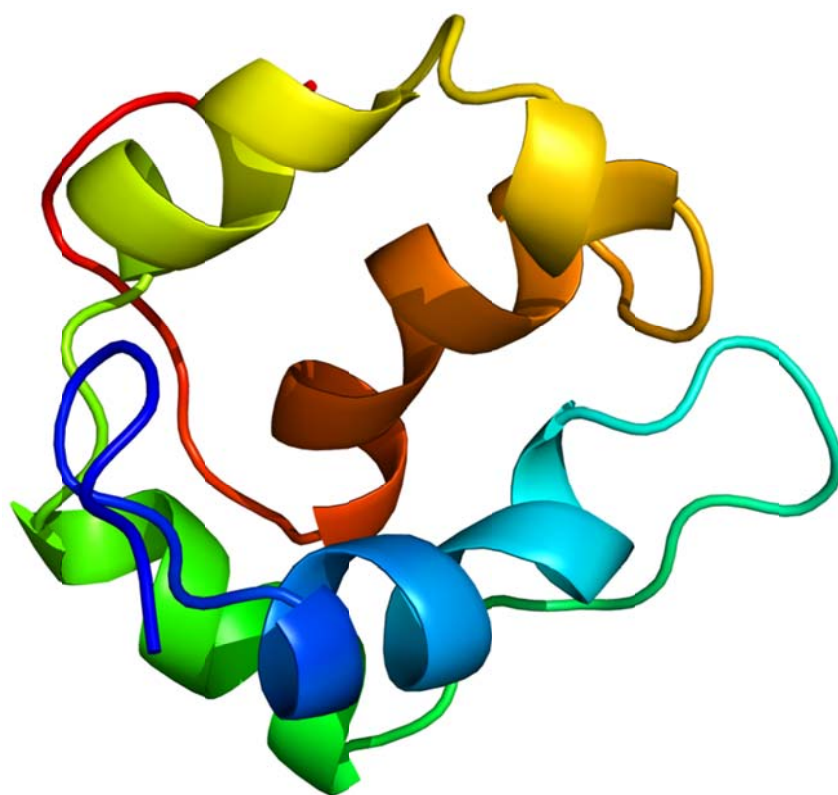

**BrnsLtpIV.1**

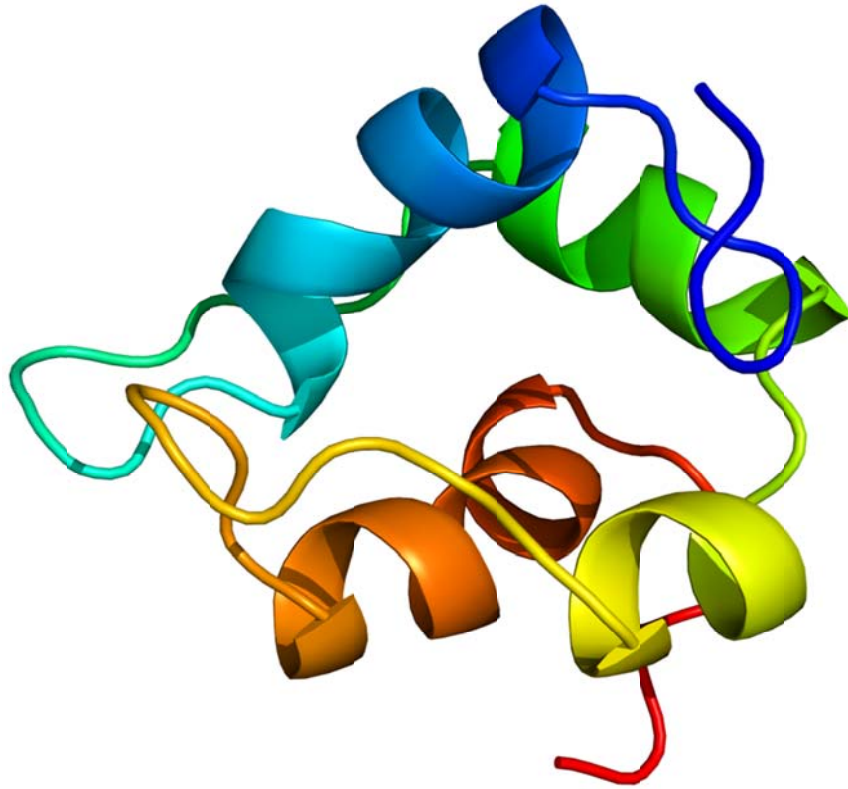

**BrnsLtpIV.2**

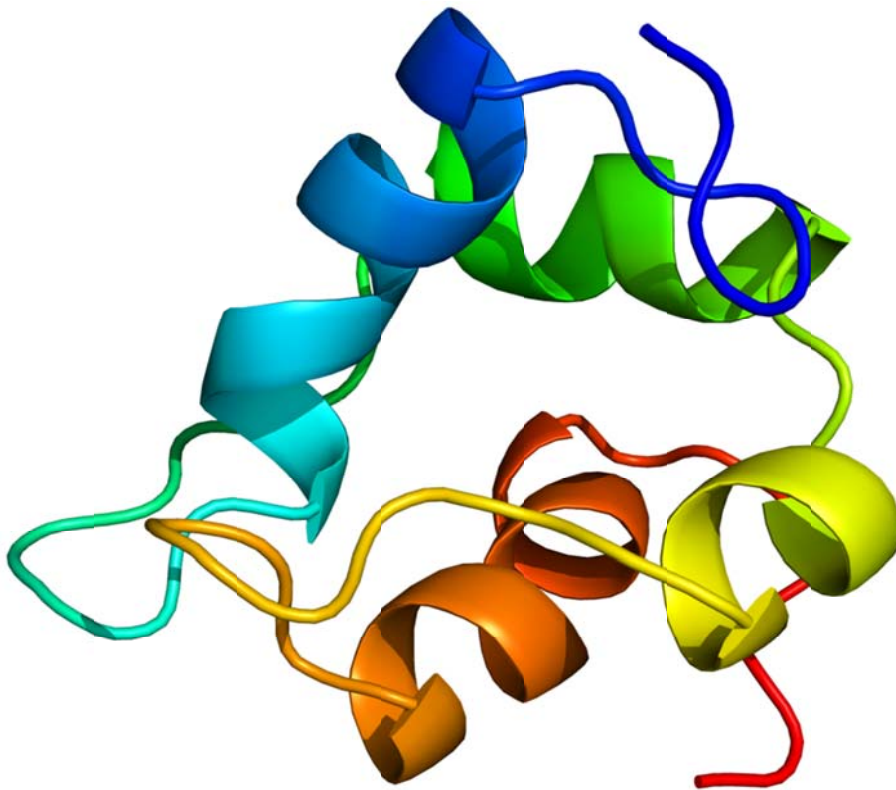

**BrnsLtpIV.3**

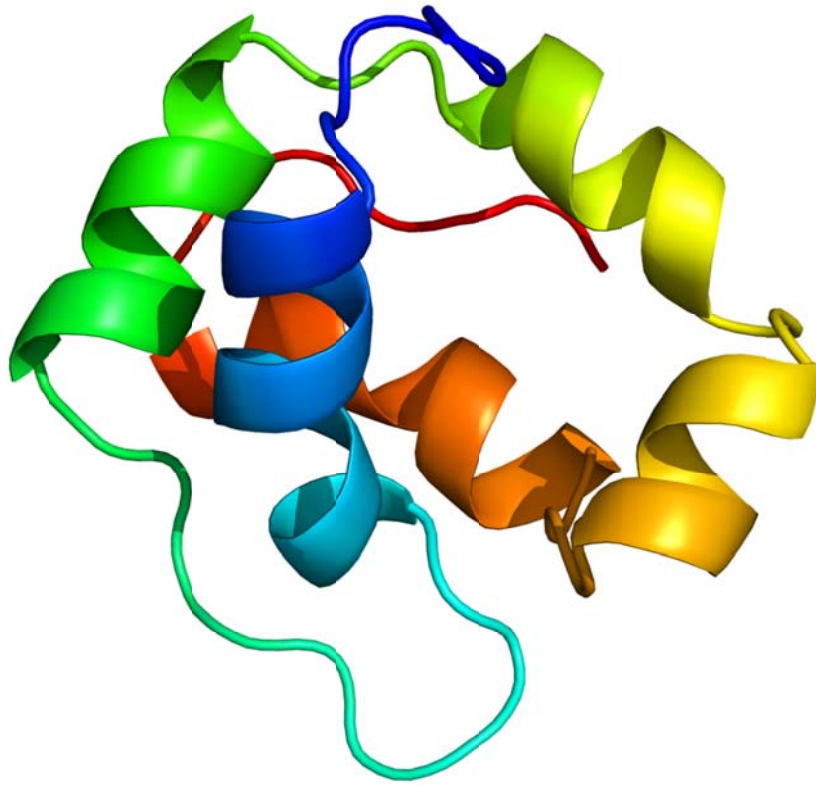

**BrnsLtpIV.4**

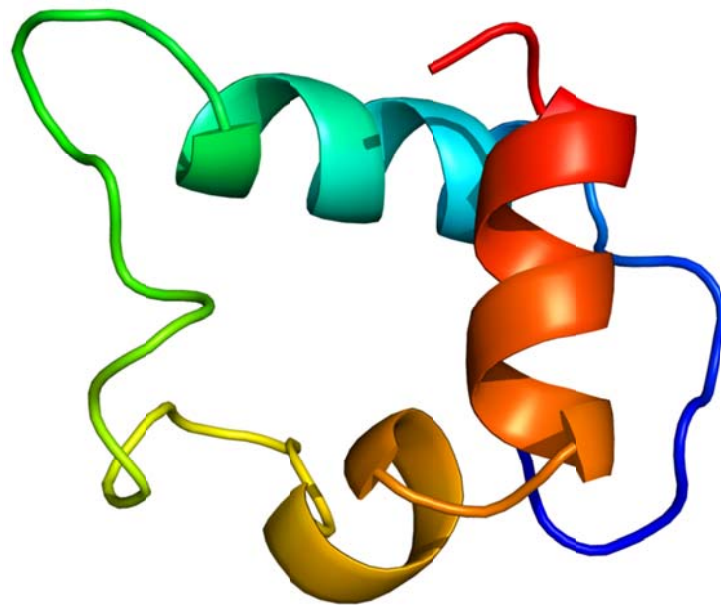

**BrnsLtpIV.5**

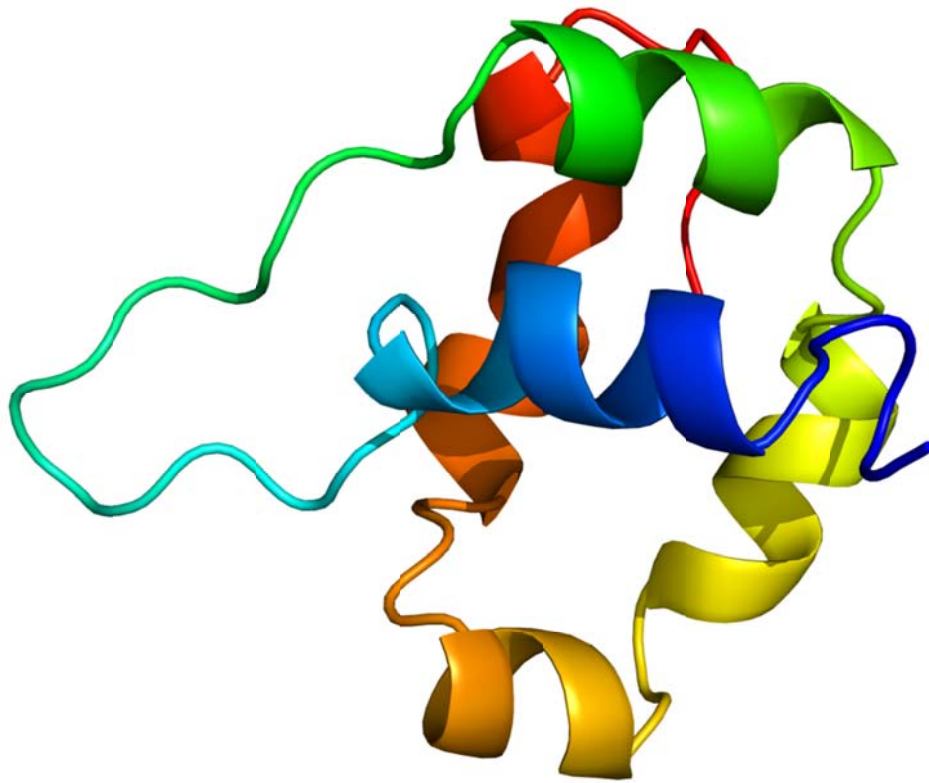

**BrnsLtpIV.6**

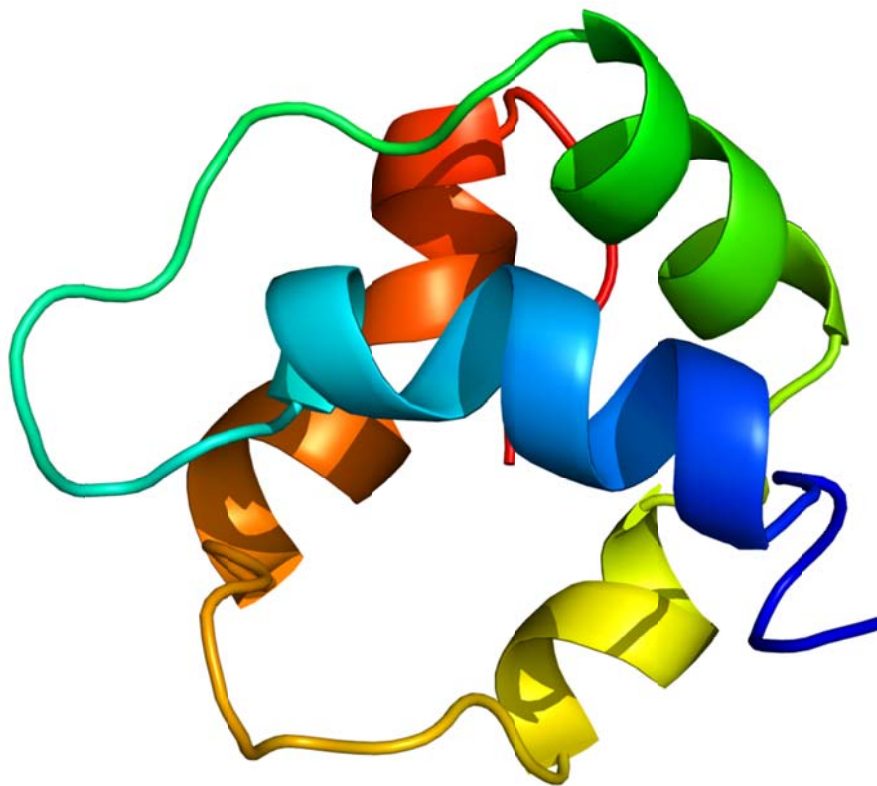

**BrnsLtpIV.7**

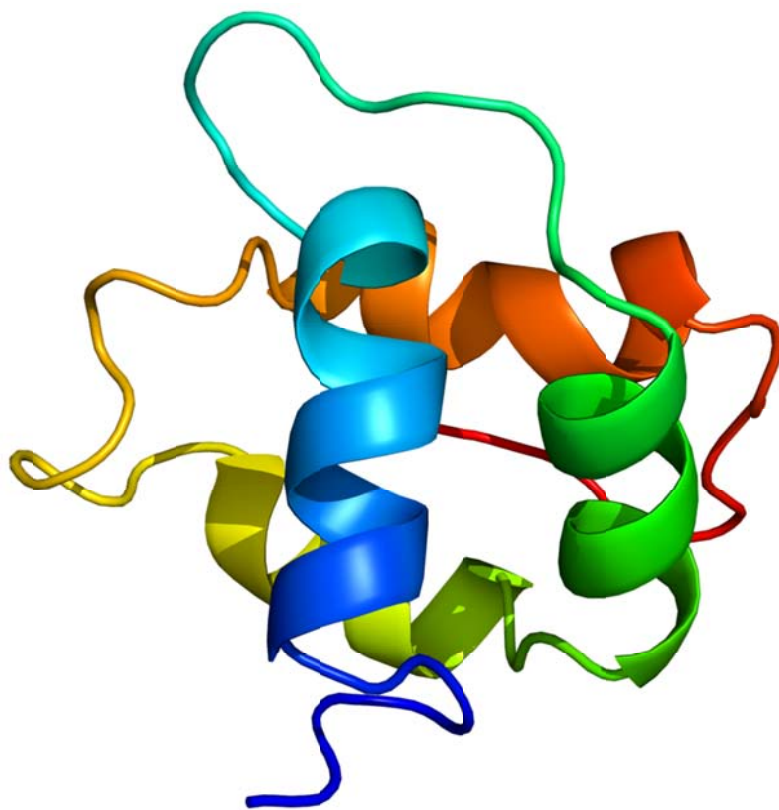

**BrnsLtpIV.8**

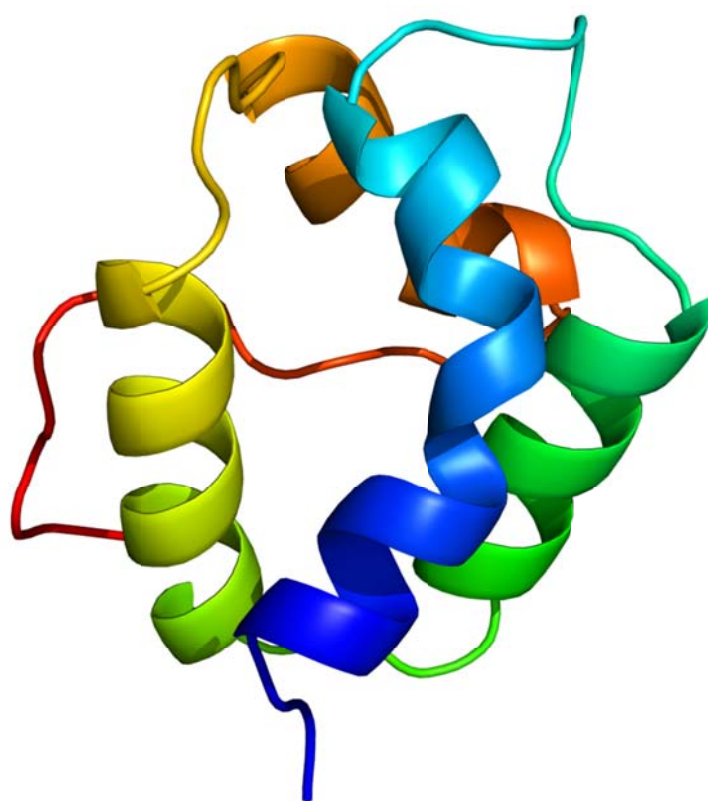

**BrnsLtpV.1**

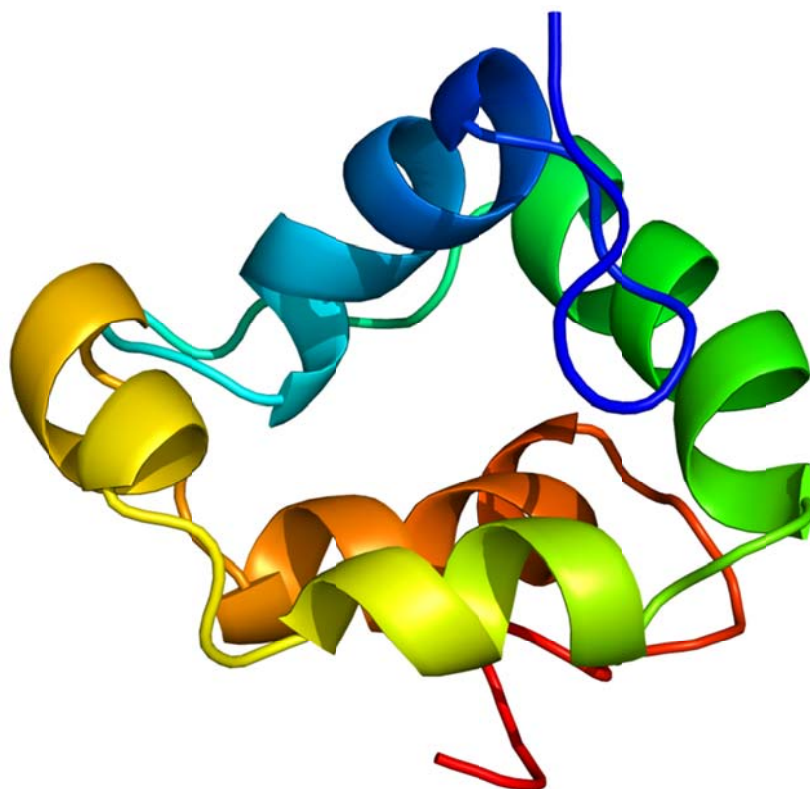

**BrnsLtpV.2**

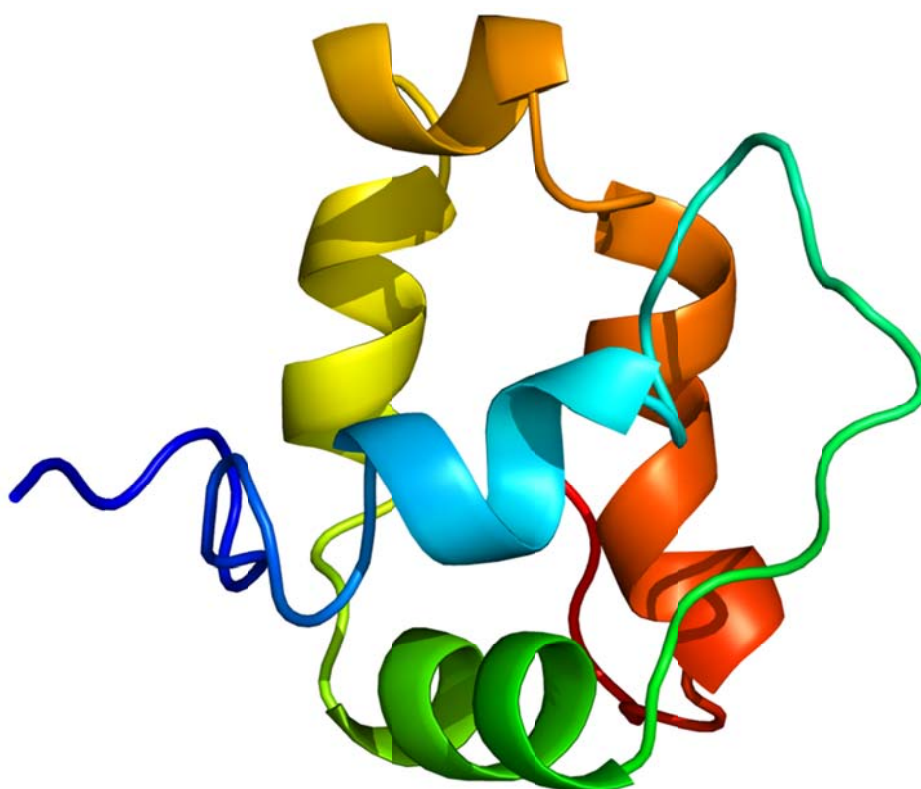

**BrnsLtpVI.1**



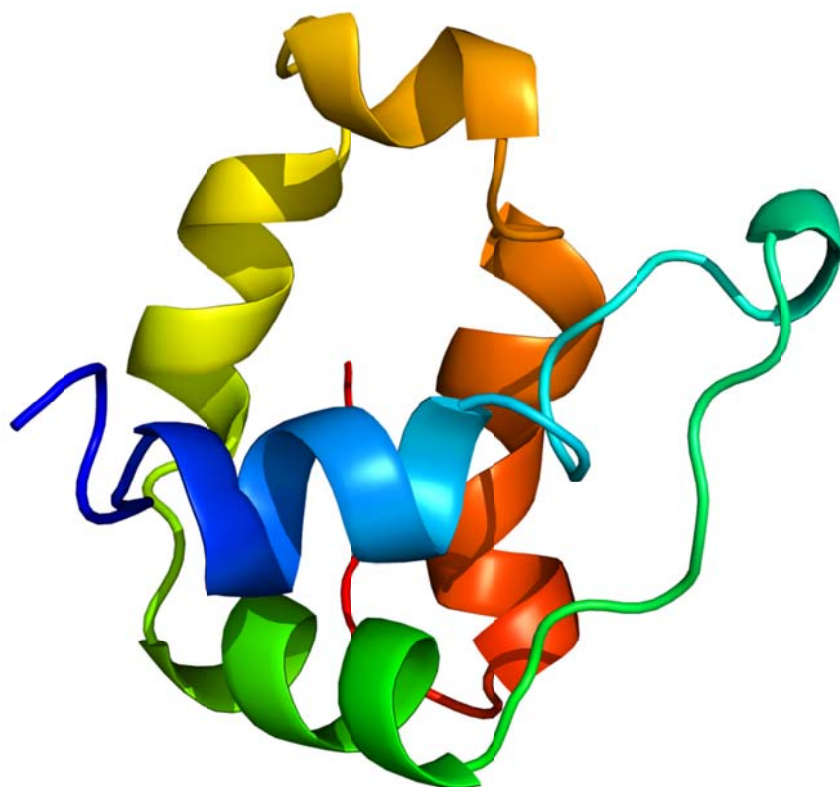

**BrnsLtpVI.2**

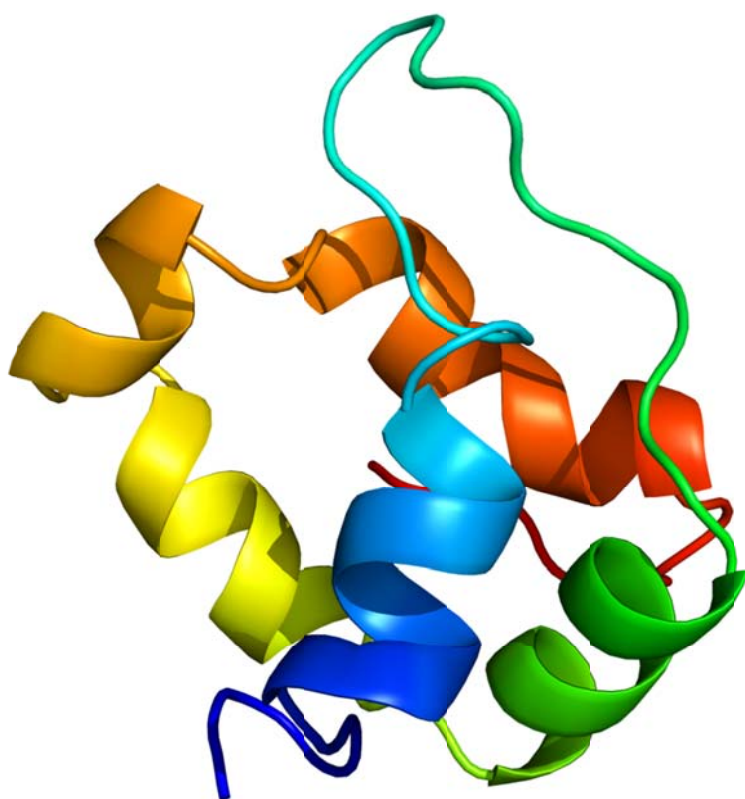

**BrnsLtpVI.3**

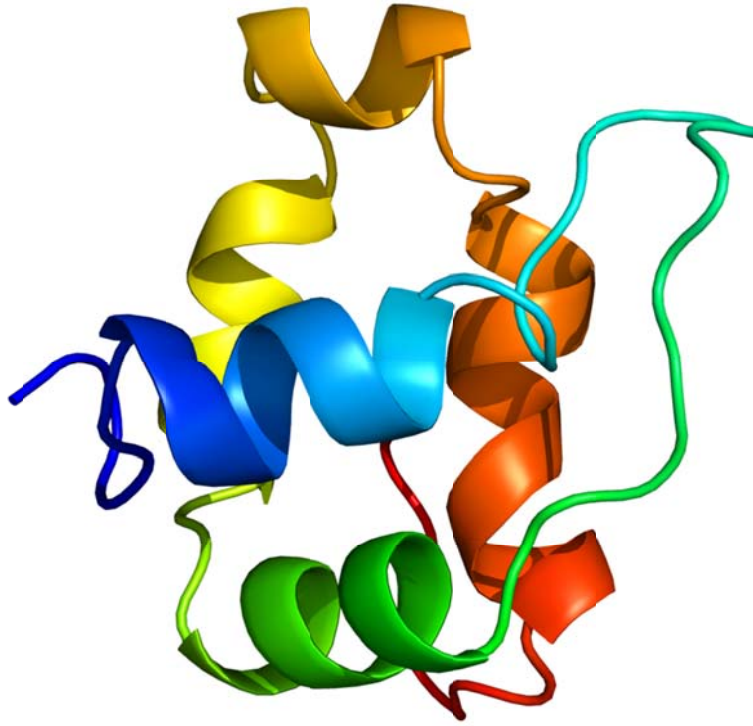

**BrnsLtpVI.4**

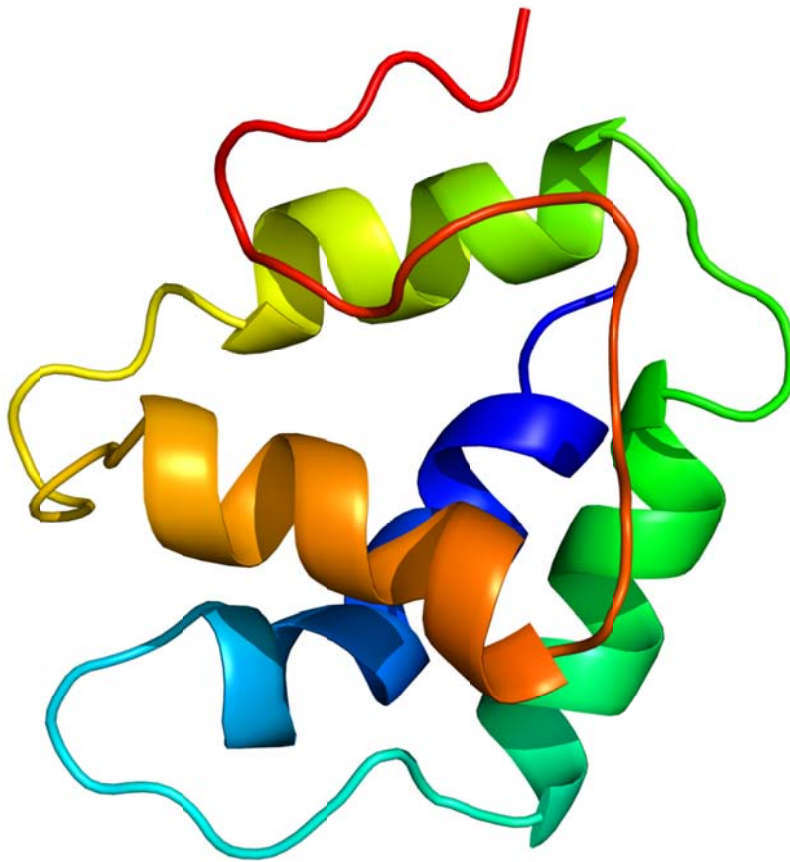

**BrnsLtpVIII.1**

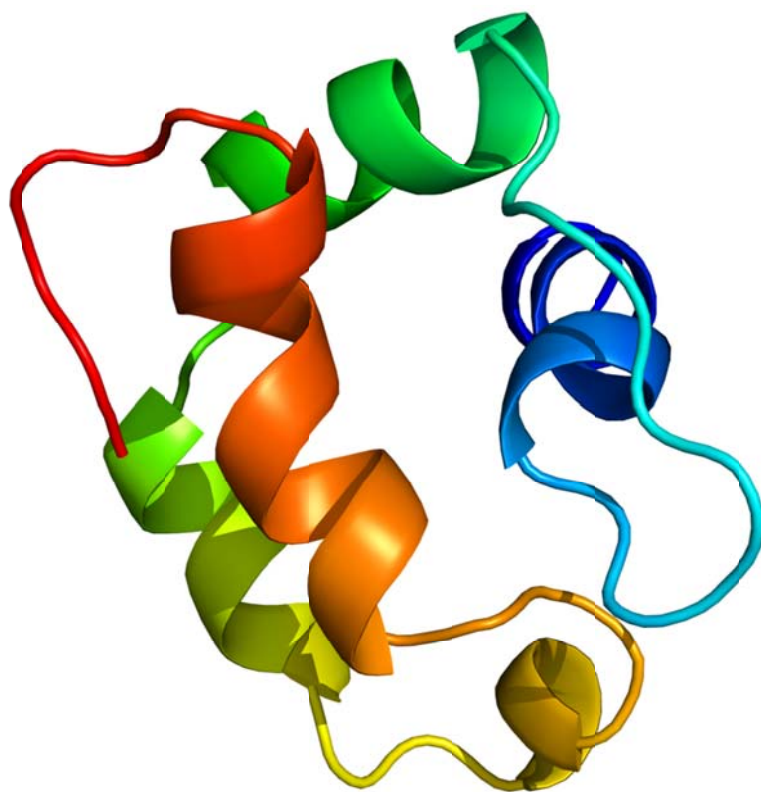

**BrnsLtpIX.1**

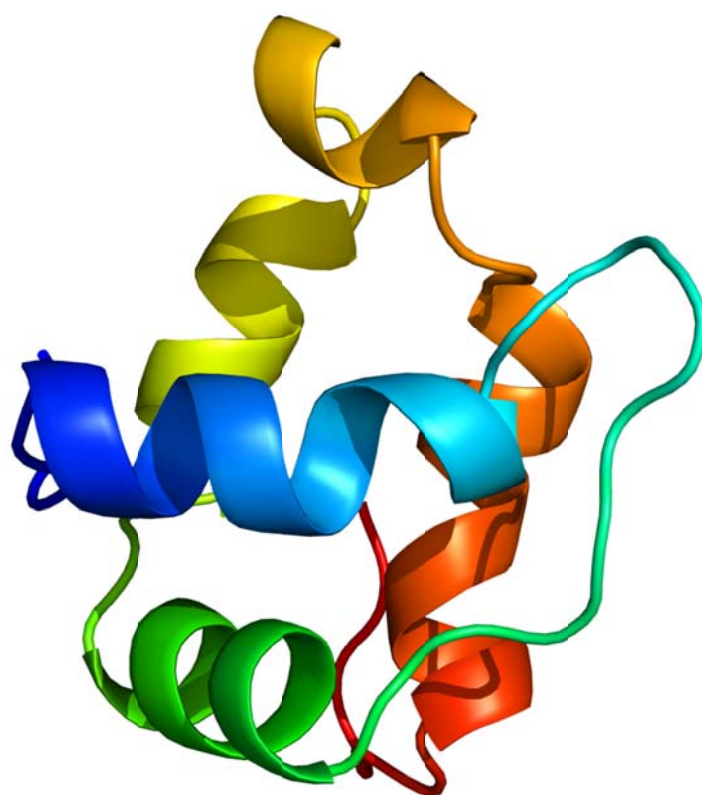

**BrnsLtpIX.2**

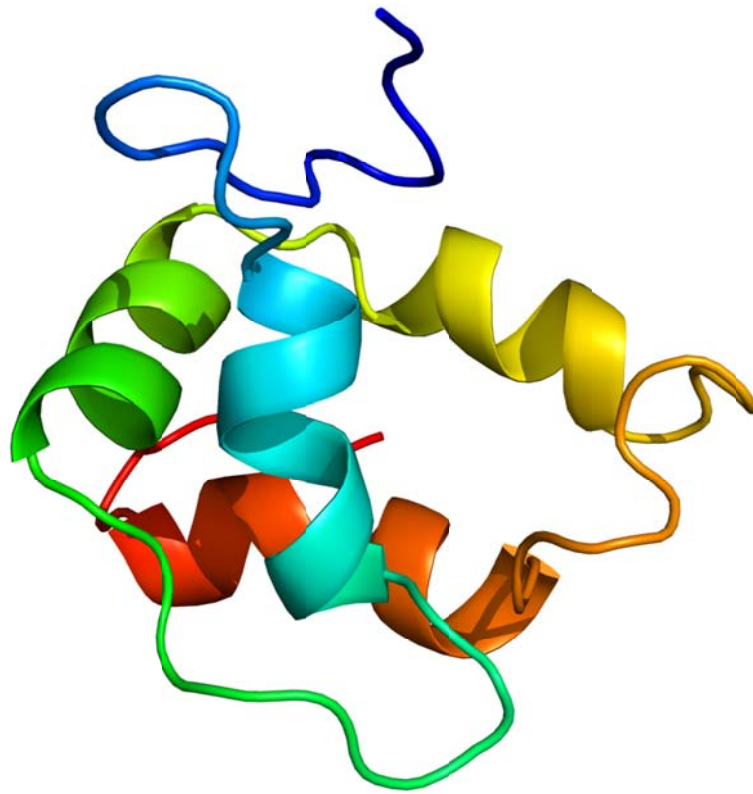

**BrnsLtpIX.3**

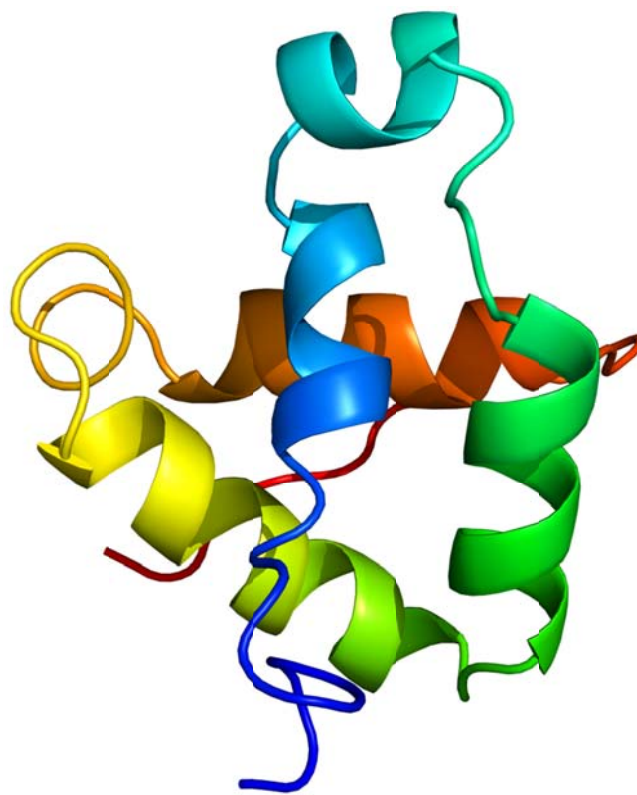

**BrnsLtpXI.1**

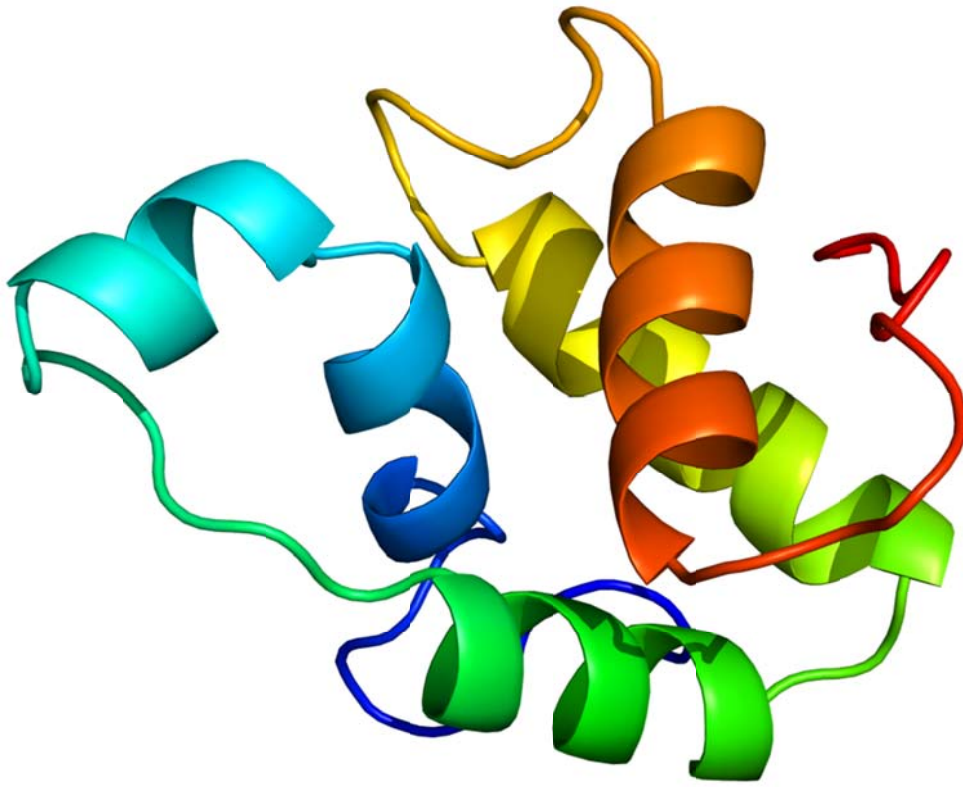

**BrnsLtpXI.2**

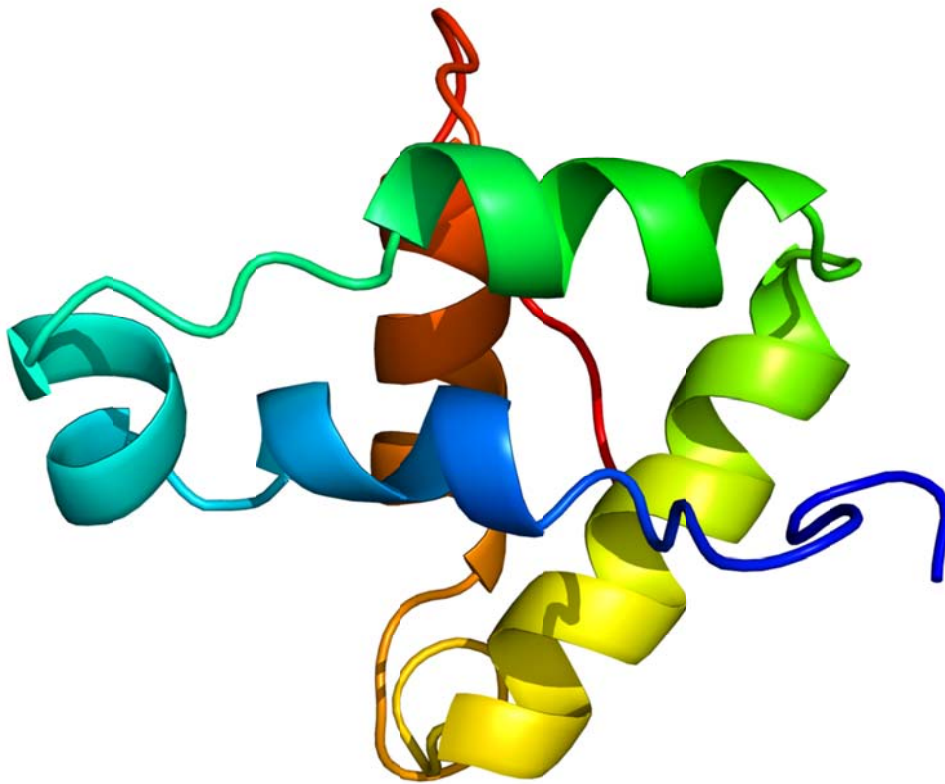

**BrnsLtpXI.3**

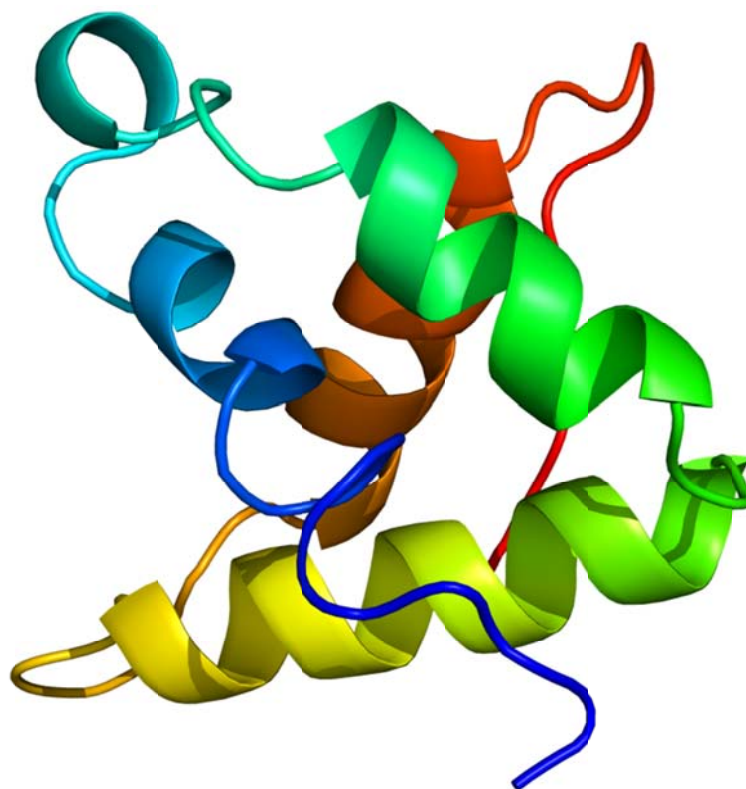

**BrnsLtpXI.4**

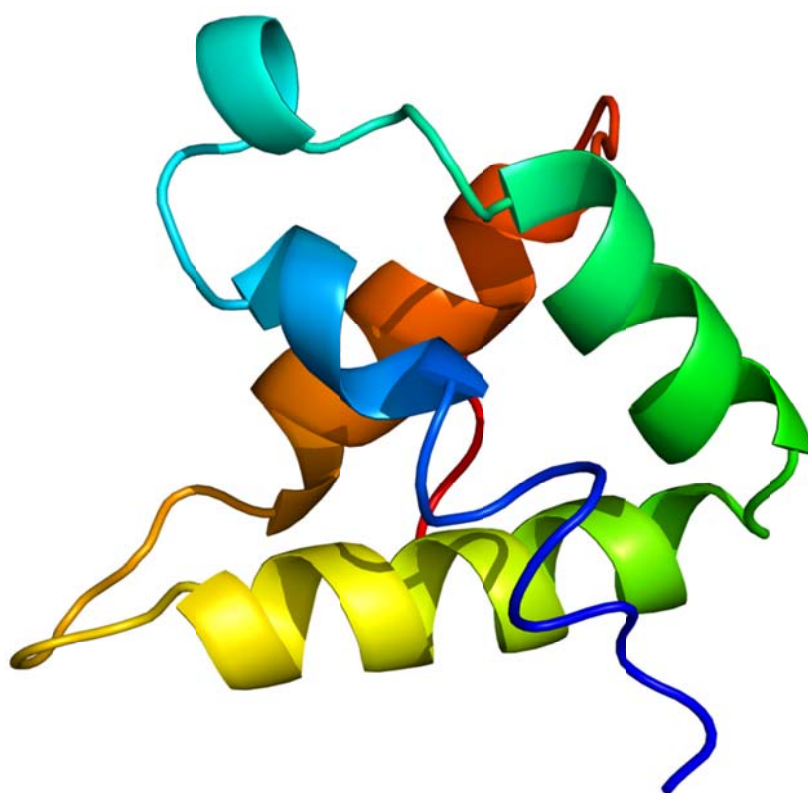

**BrnsLtpXI.5**

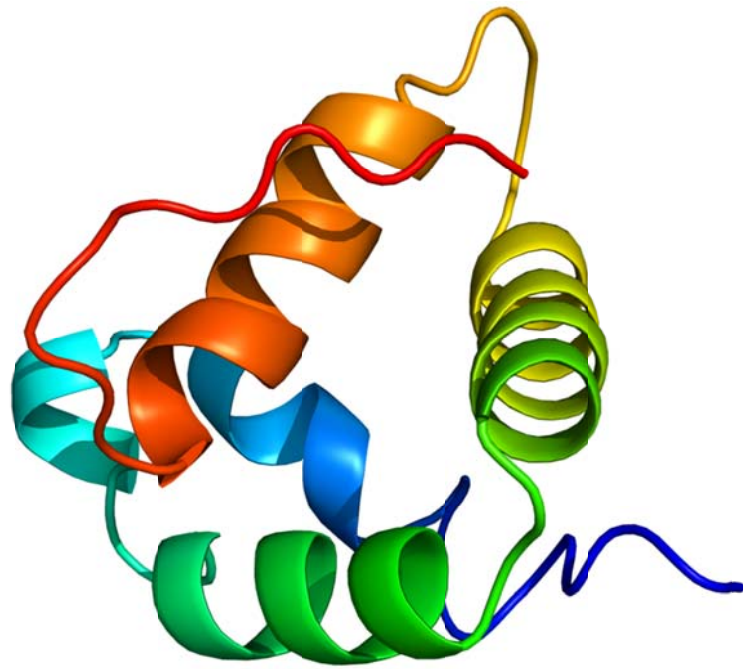

**BrnsLtpXI.6**

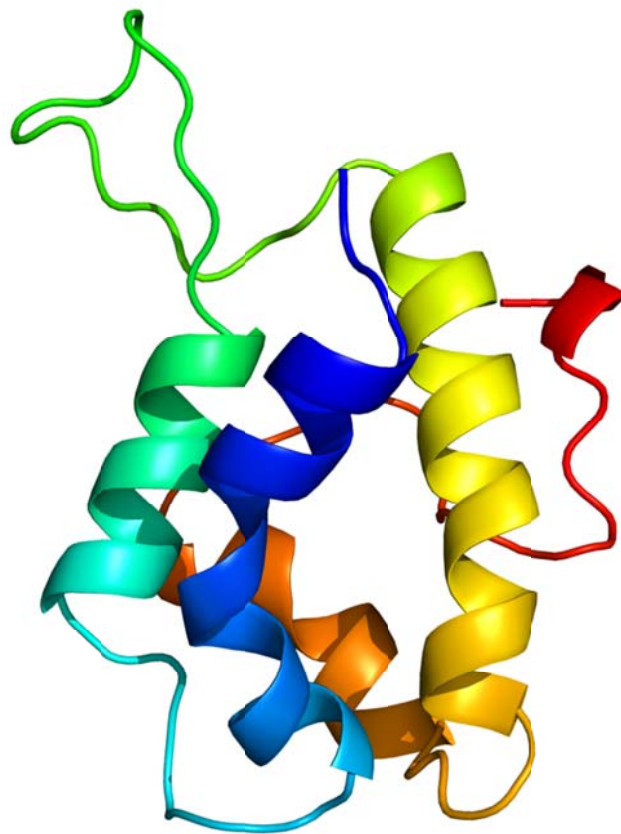

**BrnsLtpY.1**

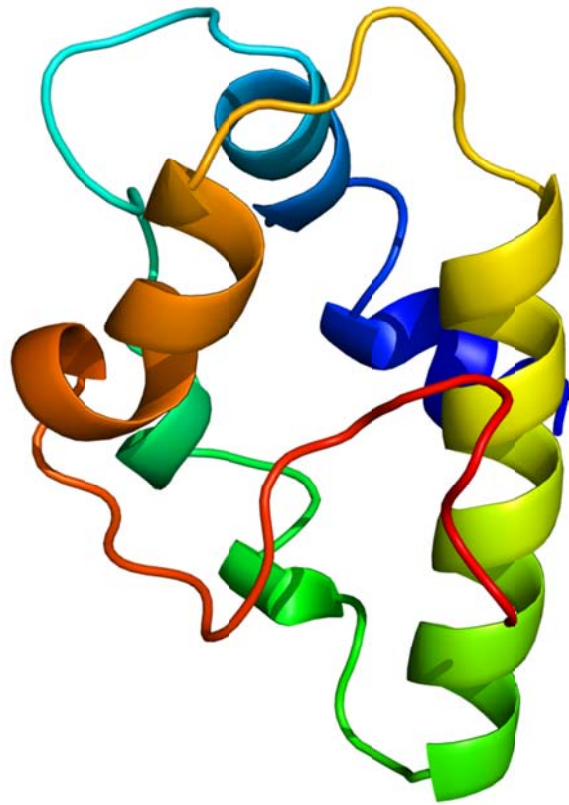

**BrnsLtpY.2**
