# Supplementary material for: Genome-Wide Survey and Expression Analysis of the Putative Non-Specific Lipid Transfer Proteins in Brassica rapa L
Source: PubMed Central journal article supplement (PMC3908880; doi:10.1371/journal.pone.0084556), 2014-01-31
Supplement: pone.0084556.s003.pdf [file pone.0084556.s003.pdf]

**Figure S3.** Schematic representation of primers used in quantitative RT-PCR analysis.

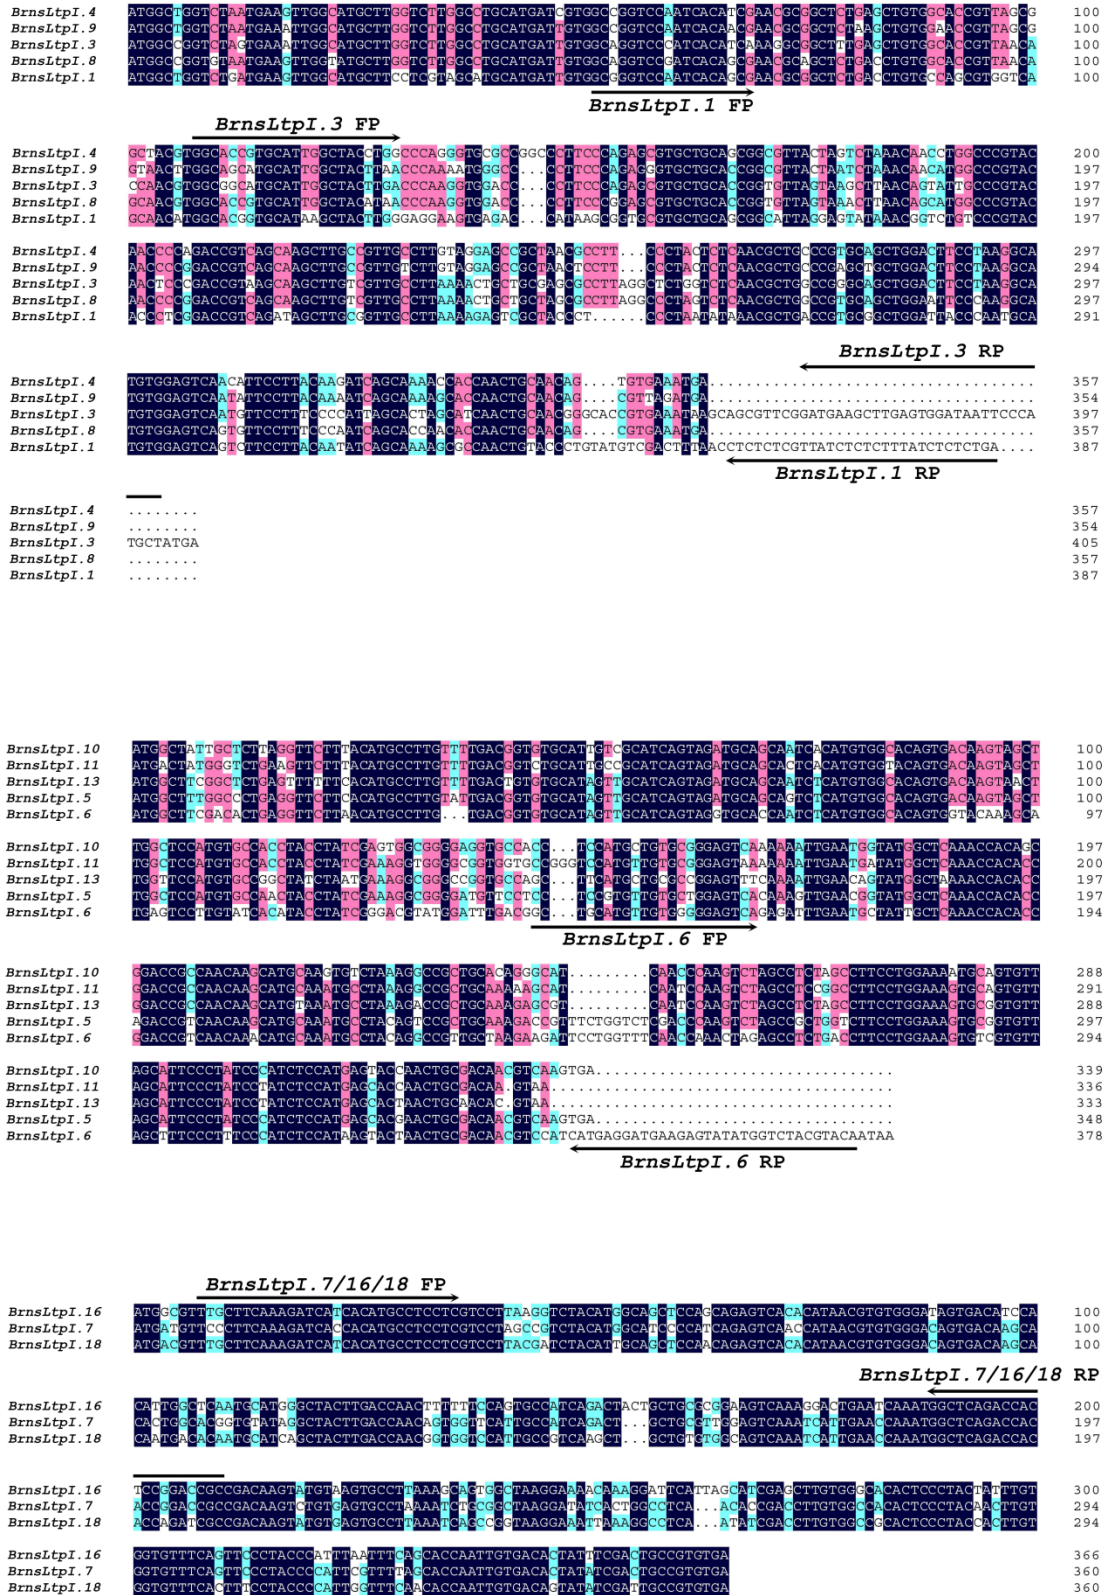

**BrnsLtpXI.4/5/6 FP**

BrnsLtpXI.4 ATGGCTTATTCTAAGATTGCTCTCTCCCTCATTGGAATGTATTTTCTTACCTTGGTCAGCTCGAATCCAGTCCCTACCAGCAAACCCACTTGFAAAA 100  
 BrnsLtpXI.6 ATGGCTTATTCTAAGATTGCTCTCTCCCTCATTGGAATGTATTTTCTTACCTTGGTCAGCTCGAATCCAGTCCCTACCAGCAAACCCACTTGFAAAA 100  
 BrnsLtpXI.5 ATGGCTTATTCTAAGATTGCTCTCTCCCTCATTGGAATGTATTTTCTTACCTTGGTCAGCTCGAATCCAGTCCCTACCAGCAAACCCACTTGFAAAA 100  
 BrnsLtpI.12 ATGGCTTATTCTAAGATTGCTCTCTCCCTCATTGGAATGTATTTTCTTACCTTGGTCAGCTCGAATCCAGTCCCTACCAGCAAACCCACTTGFAAAA 100

**BrnsLtpI.12 FP**

BrnsLtpXI.4 ATGCTCTTAAATCAAGGTGTGCAATGTGTTGGATTGGTTAAGGTTCTCTACCAACAAGATCCAAATGTTGCGGACTTATCAAAGGTCTAGTTGA 200  
 BrnsLtpXI.6 ATGCTCTTAAATCAAGGTGTGCAATGTGTTGGATTGGTTAAGGTTCTCTACCAACAAGATCCAAATGTTGCGGACTTATCAAAGGTCTAGTTGA 200  
 BrnsLtpXI.5 ATGCTCTTAAATCAAGGTGTGCAATGTGTTGGATTGGTTAAGGTTCTCTACCAACAAGATCCAAATGTTGCGGACTTATCAAAGGTCTAGTTGA 200  
 BrnsLtpI.12 ATGCTCTTAAATCAAGGTGTGCAATGTGTTGGATTGGTTAAGGTTCTCTACCAACAAGATCCAAATGTTGCGGACTTATCAAAGGTCTAGTTGA 200

**BrnsLtpXI.4/5/6 RP**

BrnsLtpXI.4 CTCTCGAAGC SCAGTTTGTCT ..... CTGCAC SCCTTAAAAGCTGATCTCCTTGCCCTCAAACCTAAATGTTCCCATTTTCATTGAGT 282  
 BrnsLtpXI.6 CTCTCGAAGC SCAGTTTGTCT ..... CTGCAC SCCTTAAAAGCTGATCTCCTTGCCCTCAAACCTAAATGTTCCCATTTTCATTGAGT 282  
 BrnsLtpXI.5 CTCTCGAAGC SCAGTTTGTCT ..... CTGCAC SCCTTAAAAGCTGATCTCCTTGCCCTCAAACCTAAATGTTCCCATTTTCATTGAGT 282  
 BrnsLtpI.12 CTCTCGAAGC SCAGTTTGTCT TGAAGCCGAGTTTGTCT CTGCAC SCCTTAAAAGCTGATCTCCTTGCCCTCAAACCTAAATGTTCCCATTTTCATTGAGT 300

**BrnsLtpI.12 RP**

BrnsLtpXI.4 GTTATCTTAAACCACTGGGTAAGAAGGTTCCATCTGGTTTCAAATGTGCCTAG 336  
 BrnsLtpXI.6 GTTATCTTAAACCACTGGGTAAGAAGGTTCCATCTGGTTTCAAATGTGCCTAG 336  
 BrnsLtpXI.5 GTTATCTTAAACCACTGGGTAAGAAGGTTCCATCTGGTTTCAAATGTGCCTAG 336  
 BrnsLtpI.12 GTTATCTTAAACCACTGGGTAAGAAGGTTCCATCTGGTTTCAAATGTGCCTAG 354

**BrnsLtpII.1/4 FP**

BrnsLtpII.1 ATGAAGTTTCTTGTCTAAACACAGTCTTCTTCACTCTGCAATCCCTCTCTGCTCATTCTTCTCAAGAAA...CAGAGTTGTTCAGGACAGTCA 96  
 BrnsLtpII.4 ATGAAGTTTCTTGTCTAAACACAGTCTTCTTCACTCTGCAATCCCTCTCTGCTCATTCTTCTCAAGAAA...CAGAGTTGTTCAGGACAGTCA 96  
 BrnsLtpII.12 ATGAAGTTTCTTGTCTAAACACAGTCTTCTTCACTCTGCAATCCCTCTCTGCTCATTCTTCTCAAGAAA...CAGAGTTGTTCAGGACAGTCA 100

**BrnsLtpII.14 FP**

BrnsLtpII.1 ...TCTGACCCATGTCAGCTTATCCCATGGCAGGAGGCCATCTGAAAGGCTTAAGCCCTCGATACATGTTGCACCGGCTGAACCAAGCAACCAACAGTC 194  
 BrnsLtpII.4 ...TCTGACCCATGTCAGCTTATCCCATGGCAGGAGGCCATCTGAAAGGCTTAAGCCCTCGATACATGTTGCACCGGCTGAACCAAGCAACCAACAGTC 194  
 BrnsLtpII.12 CTTCGACCACTGATGCTA...CAGAGTTGTTCAGGACAGTCA...CAGAGTTGTTCAGGACAGTCA...CAGAGTTGTTCAGGACAGTCA...CAGAGTTGTTCAGGACAGTCA 200

**BrnsLtpII.1/4 RP**

BrnsLtpII.1 TGTCTCCGATCATSAAGAACCCCAATTTCAATTTTCTCCGAGCTCAGCAATGCTAATAAAAAATCGCCACTGATTTGATTGCTCTAATCCCTAGTCT 294  
 BrnsLtpII.4 TGTCTCCGATCATSAAGAACCCCAATTTCAATTTTCTCCGAGCTCAGCAATGCTAATAAAAAATCGCCACTGATTTGATTGCTCTAATCCCTAGTCT 291  
 BrnsLtpII.12 TGTCTCCGATCATSAAGAACCCCAATTTCAATTTTCTCCGAGCTCAGCAATGCTAATAAAAAATCGCCACTGATTTGATTGCTCTAATCCCTAGTCT 300

**BrnsLtpII.14 RP**

BrnsLtpII.1 TAG 297  
 BrnsLtpII.4 TAG 294  
 BrnsLtpII.12 TGA 303

**BrnsLtpII.2/12 FP**

BrnsLtpII.2 ATGAACTTCAAGAGTATGATCATCAGCTTTTGTGATATCTCTTGTATCCGCTTCAGCTCCGACCAAGAAATCTTGGAAAGG...AAGTGG 91  
 BrnsLtpII.12 ATGAACTTCAAGAGTATGATCATCAGCTTTTGTGATATCTCTTGTATCCGCTTCAGCTCCGACCAAGAAATCTTGGAAAGG...AAGTGG 91  
 BrnsLtpII.11 ATGAACTTCAAGAGTATGATCATCAGCTTTTGTGATATCTCTTGTATCCGCTTCAGCTCCGACCAAGAAATCTTGGAAAGG...AAGTGG 100

**BrnsLtpII.11 FP**

**BrnsLtpII.2/12 RP**

BrnsLtpII.2 CA.....TGCACCTGACAGAACATATAATCATGCATACCAGCAATACAATCCGGAATCAACCGTCCGCTGAATGCTGCGGAAACCTGAAAGAAAGAA 185  
 BrnsLtpII.12 CA.....TGCACCTGACAGAACATATAATCATGCATACCAGCAATACAATCCGGAATCAACCGTCCGCTGAATGCTGCGGAAACCTGAAAGAAAGAA 185  
 BrnsLtpII.11 CACAATCGTGTGTGACAGAACCTGCCCATGCTTACCAGCAATGACCAAGGCTGAGAGCCGACTACA...GAATGCTGCGGAAACCTGATAGAGGAGAA 200

**BrnsLtpI.11 RP**

BrnsLtpII.2 GTCTGTGTTGTTGGTTATATCAAAATCCATTTCTTCTCASTATGTTACTCTGAAAATGTTCCAAATGCTTTAGTAACCTTGTGCTTATCTCT 285  
 BrnsLtpII.12 GTCTGTGTTGTTGGTTATATCAAAATCCATTTCTTCTCASTATGTTACTCTGAAAATGTTCCAAATGCTTTAGTAACCTTGTGCTTATCTCT 285  
 BrnsLtpII.11 ACATGTTGTTGGTTATATCAAAATCCATTTCTTCTCASTATGTTACTCTGAAAATGTTCCAAATGCTTTAGTAACCTTGTGCTTATCTCT 300

BrnsLtpII.2 TCTTCTAG 294  
 BrnsLtpII.12 ACTTGTAA 294  
 BrnsLtpII.11 AGTTCTAA 309

**BrnsLtpII.3/13 FP**

BrnsLtpII.3     .....ATGGTAAAGTGATGTGGGTTCCAGTTTAGCTCTCCGCGAGCGCTTCTCTGTGTACGCGTGCAGAACATCCCGTGGCGGAGGAAATGACCT     94  
 BrnsLtpII.13     .....ATGGTAAAGTGATGTGGGTTTTCCTTTTAGCTCTCTCCGCGAGCGCTTCTCTGTGTACGCGTGCAGAACATCCCGTGGCGGAGGAAATGACCT     94  
 BrnsLtpII.5     ATGAACCTCACAGGACCAATATGCATCGGATTGGATAGTCTCTCTTTCTCTCTTTGGCTCTCACCAATCCAGCCGCGGAAATATGAGAAATGACTGGGAA     100

**BrnsLtpII.5 FP**

**BrnsLtpII.3/13 RP**

BrnsLtpII.3     SCTCGCCGACGGAACTGACTTCATGTTTCGTGGGTTTATGTTAGCTTTCCGCGCGCTCAGCAACGTGTGCGCCAGCTGAGAGAGCAGAGCCATGCT     194  
 BrnsLtpII.13     SCTCGGTGACGGAAATGCTCTCATGTTTGGCGGTTTATGTTAGCTTTCCGCAACCGTCCGCTCTGTGTGTGCGCAGCTGAGAGAGCAGAGCCATGCT     194  
 BrnsLtpII.5     SCAATCCGAAAGAACTTAACCCATGCAGCCAGCTCTTAAAAAACGGAAGTAGCCGCTCAAAGAGTGTGCGCATCTCTGAAABAGAGAGCCGTCTCT     200

BrnsLtpII.3     TTGTGGATATCTCAGGAACCCCTGCCCTCAGCCASTACCTTAACTCTCCAAAAGCCAAAGAAAGTTGCCAGCTTCAATGTGTAAACCCGAAATGTTAA     294  
 BrnsLtpII.13     TTGTGGTACATCAGGAACCCCTGCCCTCAGCCAAATATCTTACCTCCAAAAGCCTAAGAAAGTCTCCAAAGCTTCAAGGTGTGTTCCGCAAACTGTTAA     294  
 BrnsLtpII.5     ATGTGGTTACATTAATGATCCAGTTTATGCTCAGTATATTAATCCAAAATGCTCTTAAAGCCTTCTCGTCTTGTGGTAACTCTCTTTCTTCTTGG     300

**BrnsLtpII.5 RP**

**BrnsLtpII.3/13 FP**

BrnsLtpII.3     .....ATGGTAAAGTGATGTGGGTTCCAGTTTAGCTCTCCGCGAGCGCTTCTCTGTGTACGCGTGCAGAACATCCCGTGGCGGAGGAAATGACCT     94  
 BrnsLtpII.13     .....ATGGTAAAGTGATGTGGGTTTTCCTTTTAGCTCTCTCCGCGAGCGCTTCTCTGTGTACGCGTGCAGAACATCCCGTGGCGGAGGAAATGACCT     94  
 BrnsLtpII.5     ATGAACCTCACAGGACCAATATGCATCGGATTGGATAGTCTCTCTTTCTCTCTTTGGCTCTCACCAATCCAGCCGCGGAAATATGAGAAATGACTGGGAA     100

**BrnsLtpII.5 FP**

**BrnsLtpII.3/13 RP**

BrnsLtpII.3     SCTCGCCGACGGAACTGACTTCATGTTTCGTGGGTTTATGTTAGCTTTCCGCGCGCTCAGCAACGTGTGCGCCAGCTGAGAGAGCAGAGCCATGCT     194  
 BrnsLtpII.13     SCTCGGTGACGGAAATGCTCTCATGTTTGGCGGTTTATGTTAGCTTTCCGCAACCGTCCGCTCTGTGTGTGCGCAGCTGAGAGAGCAGAGCCATGCT     194  
 BrnsLtpII.5     SCAATCCGAAAGAACTTAACCCATGCAGCCAGCTCTTAAAAAACGGAAGTAGCCGCTCAAAGAGTGTGCGCATCTCTGAAABAGAGAGCCGTCTCT     200

BrnsLtpII.3     TTGTGGATATCTCAGGAACCCCTGCCCTCAGCCASTACCTTAACTCTCCAAAAGCCAAAGAAAGTTGCCAGCTTCAATGTGTAAACCCGAAATGTTAA     294  
 BrnsLtpII.13     TTGTGGTACATCAGGAACCCCTGCCCTCAGCCAAATATCTTACCTCCAAAAGCCTAAGAAAGTCTCCAAAGCTTCAAGGTGTGTTCCGCAAACTGTTAA     294  
 BrnsLtpII.5     ATGTGGTTACATTAATGATCCAGTTTATGCTCAGTATATTAATCCAAAATGCTCTTAAAGCCTTCTCGTCTTGTGGTAACTCTCTTTCTTCTTGG     300

**BrnsLtpII.5 RP**

**BrnsLtpII.6/7/Bra001701 FP**

BrnsLtpII.7     ATGCTCATGATPCRAAGSCAATCATGGGTTTCACTCTTCCGCAACCCGCGGTTTCTCCTAGT...GATTCTAGCCCGCGGAGAGCACTGACGTGTCCG     97  
 Bra001701     ATGCTCATGATPCRAAGSCAATCATGGGTTTCACTCTTCCGCAACCCGCGGTTTCTCCTAGT...GTTCTAGTCCCGCGGAGAGCGGTGACGTGTCCG     97  
 BrnsLtpII.6     ATGGAATGATPCRAAGSCAATCATGGGTTTCACTCTTCCGCAACCCGCGGTTTCTCCTAGTGTGATCTTAGTCCCGCGGAGAGCACTGACGTGTCCG     100  
 BrnsLtpII.15     .....ATGGTCTTCACTCATGGTCTTCCGCACTTCTCCGCTCCAAAGCAAGAGCGGACAGCAAAATGTGAAACAGCAGCAGGTGACC     94

BrnsLtpII.7     CAATGCAGCTAAGCCCATGTGGCGCAAGCATAAAGCTCTCTTCTCAGCTCAGCGTTGTGTGCGCBAAGCTGAAGGACAAACCCATGCAATGTTGG     197  
 Bra001701     CAATGCAGCTAAGCCCATGTGGCGCGGCGCAATAGCTCTCTTCTCAGCTCAGCGTTGTGTGCGCBAAGCTGAAGGACAAACCCATGCAATGTTGG     197  
 BrnsLtpII.6     CAATGCAGCTAAGCCCATGTGGCATCGCBAATAGCTCTCTTCTCAGCTCAGCGTTGTGTGCGCBAAGCTGAAGGACAAACCCATGCAATGTTGG     200  
 BrnsLtpII.15     CAATGCAGCTCAGCCCTTCCCTGGCCGCAATAGTGGAGGAGGAGAGCGCTGCGTGTGCTGTGCTCBAAGCTGAAGGACAAACCCATGCAATGTTGG     194

**BrnsLtpII.15 FP**

**BrnsLtpII.6/7/Bra001701 RP**

BrnsLtpII.7     GTACATGAAACCCTAGCCCTCCGCTCTGTTAGCTCTCCCAACCGCTCGAAAGTCTTAAAGCTGCAAGCTCCCATCCCAAGCTGTGTA     291  
 Bra001701     GTACATGAAACCCTAGCCCTCCGCTCTGTTAGCTCTCCCAACCGCTCGAAAGTCTTAAAGCTGCAAGCTCCCATCCCAAGCTGTGTA     291  
 BrnsLtpII.6     GTACATGAAACCCTAGCCCTCCGCTCTGTTAGCTCTCCCAACCGCTCGAAAGTCTTAAAGCTGCAAGCTCCCATCCCAAGCTGTGTA     294  
 BrnsLtpII.15     GTTTCTTAGAACCCTGCTTTGCTCAGCAATAGCTCTCCCAACTCTCGAAAGTCTTAAAGCTGCAAGCTCCCATCCCAAGCTGTGTA     288

**BrnsLtpII.15 RP**

**BrnsLtpII.9/10 FP**

BrnsLtpII.9     ATGAAGTTCACAGGACCAATATGCATCGCACTTGTGATAGTCTGATTTCTCTTTGGATCTGACCAGTGCAGCCGCTGGAAGAAGAGATAAAGTGGCAT     100  
 BrnsLtpII.10     ATGAAGTTCACAGGACCAATATGCATCGCACTTGTGATAGTCTGATTTCTCTTTGGATCTGACCAGTGCAGCCGCTGGAAGAAGAGATAAAGTGGCAT     100

BrnsLtpII.9     GTGTCGTAACAGAACTTATCCCATGTTCCGTAATCAATATCGGAAGTCAACCTATCCAGAAATGTTGTAACACTGAAAGCAACACAGTGGTGT     200  
 BrnsLtpII.10     GTGTCGTAACAGAACTTATCCCATGTTCCGTAATCAATATCGGAAGTCAACCTATCCAGAAATGTTGTAACACTGAAAGCAACACAGTGGTGT     200

BrnsLtpII.9     ATGTGGTTACATCAAAAATCCAGTATGTTGGTGGTTTTTAAAGAAATGCTCAGAGTCTTCAACGGCTTGTGGTGTACCTTACCCTACTTGTGTA     294  
 BrnsLtpII.10     ATGTGGTTACATCTCAAAATCCAGTATGTTGGTCAATTTATAAAGAAATGCTCAGAGTCTTCAACGGCTTGTGGTGTACCTTACCCTACTTGTGTA     294

**BrnsLtpII.9/10 RP**

**BrnsLtpIII.1 FP**

BrnsLtpIII.1 ... ATGGAATTTCTCAAATCCTTTCAACTATTTCTCTTTGAAATTTCTCTGCCATGAGCCTCTGGAGACCTACTATGCTTCGASCTCAACAATGCC 97  
 BrnsLtpIII.2 ATGGTATCAATTTCCAGCTCTTCCAATCTTCTACAAATCATGAGAGTGGTGTGATGCTGTGGCTTCTGGGAGAGTGGTGCATGGACAAGCT 100  
 BrnsLtpIII.3 ..... ATGATCATGAGAGTGGCTGGCTGTGGCTGGTGTGTTGGGAGATGAGGTGCACGGACAAGCT 67

**BrnsLtpIII.2/3 FP**

BrnsLtpIII.1 TAGTCA... AATTGAGCAATAAGCAGTGTGTGCGCCCTGCTTCTGCTGCTGCTGCTGCTAATTCAGCCTCCGAATTAATTCCTGCAATTCCTCTCCAGGC 194  
 BrnsLtpIII.2 GCAATACGCACTTGAGTGGACTCAACCTGTGTGCTGAGCTTTAGTTCACAGACCAACAGAGCAACCCGACTCCGAGCTCTTCCATTCCTCTTCAAGGC 200  
 BrnsLtpIII.3 GCATATCGCACTTGAGTGGACTCAACCTGTGTGCTGAGCTTTAGTTCACAGACCAACAGAGCAACCCGACTCCGAGCTCTTCCATTCCTCTTCAAGGC 167

**BrnsLtpIII.1 RP**

BrnsLtpIII.1 AACAAACAAATTTCTATAAGTAAAGCCCTTCGAGCAAGCAGCACATTAACAATACTGCAAGCCTCCCTCTTTAGATGTTGGTATACCATATGA 291  
 BrnsLtpIII.2 AGTCCCGAGCAGCTCATTTGCAACAGATTTGCGATTTCCTCCAGGCTTCCACTCGCTGCAACATCCCTTACCTTTCAGCAACTGA..... 288  
 BrnsLtpIII.3 AGTCCCGAGCAGCTCATTTGCAACAGATTTGCGATTTCCTCCAGGCTTCCACTCGCTGCAACATCCCTTACCTTTCAGCAACTGA..... 255

**BrnsLtpIII.2/3 RP**

**BrnsLtpIV.1 FP**

BrnsLtpIV.1 ATGGATTGAGAACAAACACCAACCAATCTGAGCAGCTCTGTTGATGTTTTCCTGCTTCTGTTAAATGGAAGAACCAAGAGCATTCCATATGTTAAC 100  
 BrnsLtpIV.2 ATGGATTGAGAACAAACACCAACCAATCTGAGCAGCTCTGTTGATGTTTTCCTGCTTCTGTTAAATGGAAGAACCAAGAGCATTCCATATGTTAAC 100  
 BrnsLtpIV.3 ATGGATTGAGAACAAACACCAACCAATCTGAGCAGCTCTGTTGATGTTTTCCTGCTTCTGTTAAATGGAAGAACCAAGAGCATTCCATATGTTAAC 100

**BrnsLtpIV.2/3 FP** **BrnsLtpIV.1 RP**

BrnsLtpIV.1 TCAGAGCAAACACTTGGAGAAGTCCCTCCAGCAGTACAGAGAAACAACCCGCTCCAGGTTAGTGGATGCTGCATAGTCCCTCAAGCTGCTGATCT 200  
 BrnsLtpIV.2 TCAGAGCAAAGACTTGGAGAAGTCCCTCCAGCAGTACAGAGAAACAACCCGCTCCAGGTTAGTGGATGCTGCATAGTCCCTCAAGCTGCTGATCT 200  
 BrnsLtpIV.3 TCAGAGCAAACGACTTGGAGAAGTGAATCCAGCAGTACAGAGAAACAACCCGCTCCAGGTTAGTGGATGCTGCATAGTCCCTCAAGCTGCTGATCT 200

**BrnsLtpIV.2/3 RP**

BrnsLtpIV.1 CGAATGCTGTCTGAAATTTAAATCTCATTTCCAAATTTTAAAGCAACATTCATTAAGTCTGCTTCTCTGAGAAATGTTGGCATTAAAGCAATCCC 299  
 BrnsLtpIV.2 TGAATGCTGTCTGAAATTTAAATCTCATTTCCAAATTTTAAAGCAACATTCATTAAGTCTGCTTCTCTGAGAAATGTTGGCATTAAAGCAATCCC 291  
 BrnsLtpIV.3 TGAATGCTGTCTGAAATTTAAATCTCATTTCCAAATTTTAAAGCAACATTCATTAAGTCTGCTTCTCTGAGAAATGTTGGCATTAAAGCAATCCC 291

BrnsLtpIV.1 TCCTGCATGCCAGATTAACCAACCAAGTATCATAG 333  
 BrnsLtpIV.2 TCCTGTTTGCCATGTA..... 309  
 BrnsLtpIV.3 TCCTGTTTGCCATGTA..... 309

**BrnsLtpIV.4 FP**

BrnsLtpIV.4 ATGGCCAGTAAGAAGTGGGTGTATGTTGATGATGATGATGATGATGATGGTGGTGGATGGTATTATTCGCGAAGGGTCACTGGCAGTTATGTGGCA 100  
 BrnsLtpIV.6 ..... ATGGCCCAAAACCTATGCTGCTGATTTACCTTGGTCTTCCCTTGCATCTCCGCAACCGGAGATTTGTGGTA 82

**BrnsLtpIV.6 FP**

BrnsLtpIV.4 TGACCCAGTCAAGTTGATGAGTGCAGAACAGCCGGTGGAGGAGAAATCCACAGAACCTGACG..... CTTGCTGGACTATCTGAA 188  
 BrnsLtpIV.6 TGACCCAGTCAAGTTGATGAGTGCAGAACAGCCGGTGGAGGAGAAATCCACAGAACCTGACG..... CTTGCTGGACTATCTGAA 182

**BrnsLtpIV.6 RP**

**BrnsLtpIV.4 RP**

BrnsLtpIV.4 ACACCTGACATCAGCTGCTTTGCGCTACAGAAACCTCTCTTTTTCGCTTCTTTCGGTATTGATCCGCGCTGCTGCTGGACTCCCACCAGATGT 288  
 BrnsLtpIV.6 TAAAGCTGACATCAGCTGCTTTGCGCTACAGAAACCTCTCTTTTTCGCTTCTTTCGGTATTGATCCGCGCTGCTGCTGGACTCCCACCAGATGT 282

BrnsLtpIV.4 CACAAGCCCAACCTCCAACTTCTATA 315  
 BrnsLtpIV.6 CGATATCTGGTGC... AACTTGTATA 306

**BrnsLtpV.1 FP**

BrnsLtpV.1 ATGAACTGCTTAAAGTTATTCCTGCTCTTCTATGAGTCTTCTCAACACTTGGCTTCCTGTTAGCGCCTGAGTGTGCTGCTCATGCTCATGCTC 100  
 BrnsLtpV.2 ATGAACTGCTTAAAGTTATTCCTGCTCTTCTATGAGTCTTCTCAACACTTGGCTTCCTGTTAGCGCCTGAGTGTGCTGCTCATGCTCATGCTC 100

**BrnsLtpV.2 FP**

BrnsLtpV.1 AAGCTGCGCTAGCTTGAATCCCTGTTTCTGCTCAAGAGACCCAGGGTAAAGGTTCCACCCGGTTGTTGTGCCAAGTGGGTGCTCTCATTAAGAC 200  
 BrnsLtpV.2 AAGCTGCGCTAGCTTGAATCCCTGTTTCTGCTCAAGAGACCCAGGGTAAAGGTTCCACCCGGTTGTTGTGCCAAGTGGGTGCTCTCATTAAGAC 198

**BrnsLtpV.1 RP**

BrnsLtpV.1 CAACCTCTGTCTTGTCTGTCTGTCTGCTCTTCTCTTTCGCAAGAAAGCTGGAATCAATCCTGAGTTCGCAATTCCTATTCTTAAACGCTCTAACATC 300  
 BrnsLtpV.2 CAACCTCTGTCTTGTCTGTCTGTCTGCTCTTCTCTTTCGCAAGAAAGCTGGAATCAATCCTGAGTTCGCAATTCCTATTCTTAAACGCTCTAACATC 297

BrnsLtpV.1 CGCAACCCGCTGCTTGGCAAGAGTGGAAAGTTA... CATTGTTTCCATGA..... 348  
 BrnsLtpV.2 GCTAACCCGCTGCTTGGCAAGAGTGGAAAGTTA... CATTGTTTCCATGA..... 340

**BrnsLtpV.2 RP**

**BrnsLtpVI.2/3/4 FP**

```

BrnsLtpVI.3 ATGGCAAGTGGAAAGATAATATCAGCGTTCTAGCAATAGCATTCTCATCATCGGTTCCGACAAATGTCAACGTGGCCACAGCTCAGTTCTGTGGAGCTA 100
BrnsLtpVI.4 ATGGCAAGTGGAAAGATAATATCAGCGTTCTAGCAATAGCATTCTCATCATCGGTTCCGACAAATGTCAACGTGGCCACAGCTCAGTTCTGTGGAGCTA 100
BrnsLtpVI.2 ATGGCAAGTGGAAAGATAAASHTAATGSHHTCTAGCAATAGCTTCTCATCATCGGTTCCGACAAATGTCAACCATGGGACAGCTCAGCTCTGTGGAGCTA 100
BrnsLtpVI.1 ATGGCGACAGGTTCTCGTCTCTCAGTCSSTCTAGCAATAGA...TCCRCATCATTCAGGAAACCTGCTATTTCCAGGGAGAGAA...CGTGCCAGAGAG 94

```

**BrnsLtpVI.1 RP**                      **BrnsLtpVI.2/3/4 RP**

```

BrnsLtpVI.3 ACGTGTGGGACTGATGARTGAGTGCAACGCTACGTACAGCAACGCGGACCAAAATTCCTCCGCCCATCTCGGTCTGTGCTATAACCGTCCCTAT 200
BrnsLtpVI.4 ACGTGTGGGACTGATGARTGAGTGCAACGCTACGTACAGCAACGCGGACCAAAATTCCTCCGCCCATCTCGGTCTGTGCTATAACCGTCCCTAT 200
BrnsLtpVI.2 ACGTGTGGGACTGATGARTGAGTGCAACGCTACGTACAGCAACGCGGACCAAAATTCCTCCGCCCATCTCGGTCTGTGCTATAACCGTCCCTAT 200
BrnsLtpVI.1 AATCGAGGTTCTATGAGAGATGCTGTCTACGTTACAGCGTCTCGGCGCAAAAGGT...AAACCCATCTCGCACCGGTCTCAAAGTCGTATAGAGATC 191

```

**BrnsLtpVI.1 RP**

```

BrnsLtpVI.3 CGACGTACCTTGTGCATGCCGCTACCTTCAAGGGATTTACCAACTATATGATGATGACAAAGTTCTTTATGTTCTCGTTCTCCGGCAACAGAGATT 300
BrnsLtpVI.4 CGACGTACCTTGTGCATGCCGCTACCTTCAAGGGATTTACCAACTATATGATGATGACAAAGTTCTTTATGTTCTCGTTCTCCGGCAACAGAGATT 300
BrnsLtpVI.2 AGATATACCTGTGTTGTGCTACCTTACCTAGGGATTTATSAACACTTTTGATGATGACAAAGTTCTTTATGTTCTCGTTCTCCGGCAACAGAGATT 300
BrnsLtpVI.1 AGACATCCCTTCCCATGTGCGCTATCAACCCCTCGGTTCAAAAGATGATASACATGAAATAGGTTCTTTGTTCACCTCCCTTTGTGGAGCCCTCTCC 291

BrnsLtpVI.3 CCATCTGGTATAAATGTGGAAGTTACACANTCCGGCGGCTTAG 345
BrnsLtpVI.4 CCATCTGGTATAAATGTGGAAGTTACACANTCCGGCGGCTTAG 345
BrnsLtpVI.2 CCATCTGGTATAAATGTGGAAGTTACACANTCCGGCGGCTTAG 345
BrnsLtpVI.1 GTCATGGTACCBAAGTGTGGAAGTAACTCTGTAT...CAATTA 333

```

```

BrnsLtpXI.5 .....ATGGCTATTCTAAGATTGCTCTCGTCCCTATTGTGAATSTATTATTTCTCAACCTTGTAGTCTCGAATCCAGTCCCT 78
BrnsLtpXI.6 .....ATGGCTATTCTAAGATTGCTCTCGTCCCTATTGTGAATSTATTATTTCTCAACCTTGTAGTCTCGAATCCAGTCCCT 78
BrnsLtpXI.4 .....ATGGCTATTCTAAGATTGCTCTCGTCCCTATTGTGAATSTATTATTTCTCAACCTTGTAGTCTCGAATCCAGTCCCT 78
BrnsLtpXI.3 ATGGCTATTCTCAAAAGCTTTCCATGCTTCCTGGCTCTGCTAGTCCTCAAGTCAACATTCCTCTTTGTCAATGCCATTAAGCAATGCCCTCCCTCCA 100

```

**BrnsLtpXI.3 FP**

```

BrnsLtpXI.5 TACCCCAAAACCACTGTGTA.....AATGCTCTTAATTCAAGCTGTGCTCCCAATGTTTSSATTTGTTTAAAG.....TTTCTCCTACCAACAG 164
BrnsLtpXI.6 TACCCCAAAACCACTGTGTA.....AATGCTCTTAATTCAAGCTGTGCTCCCAATGTTTSSATTTGTTTAAAG.....TTTCTCCTACCAACAG 164
BrnsLtpXI.4 TACCCCAAAACCACTGTGTA.....AATGCTCTTAATTCAAGCTGTGCTCCCAATGTTTSSATTTGTTTAAAG.....TTTCTCCTACCAACAG 164
BrnsLtpXI.3 GAAACAATCATCATGAAATGTCCAAAGCACAAGGTAAAGTTGGAATCTGTGGGAGCTGTTASCTAGATTCTTGGTTCATCCGACACCAACAG 200

BrnsLtpXI.5 ATCCAAATGTTTCCGACTTTCAAAAGTCTAAGTATCTGAAGCTCAAGGCTAGTTGCTCTCGCACCCGCTTAAAGTGATCTCTTGGCTCAAACATAAT 264
BrnsLtpXI.6 ATCCAAATGTTTCCGACTTTCAAAAGTCTAAGTATCTGAAGCTCAAGGCTAGTTGCTCTCGCACCCGCTTAAAGTGATCTCTTGGCTCAAACATAAT 264
BrnsLtpXI.4 ATCCAAATGTTTCCGACTTTCAAAAGTCTAAGTATCTGAAGCTCAAGGCTAGTTGCTCTCGCACCCGCTTAAAGTGATCTCTTGGCTCAAACATAAT 264
BrnsLtpXI.3 CCAGGATGTTTGTCTACTTTCAAAAGTCTAAGTATCTGAAGCTCAAGGCTAGTTGCTCTCGCACCCGCTTAAAGTGATCTCTTGGCTCAAACATAAT 300

BrnsLtpXI.5 G...TTCCCATTCATGAGTCTTAACTTAAACACTGTGGTAAGAGGTTCCATCTGTTCAAATGTCCTAG 336
BrnsLtpXI.6 G...TTCCCATTCATGAGTCTTAACTTAAACACTGTGGTAAGAGGTTCCATCTGTTCAAATGTCCTAG 336
BrnsLtpXI.4 G...TTCCCATTCATGAGTCTTAACTTAAACACTGTGGTAAGAGGTTCCATCTGTTCAAATGTCCTAG 336
BrnsLtpXI.3 AAACTTCCCTGTTCTCAGCTTTCAGTCTTGTGGCAAGACTCTTCACAGGAATGTCTGTGTGA... 372

```

**BrnsLtpXI.3 RP**

**BrnsLtpY.1 FP**

```

BrnsLtpY.1 ATGAAGATACATCGTCCCAATCTCGCTGCACCTTSCCTTTCATCAGACCSCCTTTCCCAATTTCAATGCAT...TGACAGTGCASAGAGCTCT 97
BrnsLtpY.2 .....ATGAAGATACATCGTCCCAATCTCGCTGCACCTTSCCTTTCATCAGACCSCCTTTCCCAATTTCAATGCAT...TGACAGTGCASAGAGCTCT 82

```

**BrnsLtpY.2 FP**

```

BrnsLtpY.1 TCACAGATTCATGCCCAGCATGSCCTTCGTTCGACGACATCTTCAGCACCCTTCCTCAACAATGCTTASAGCGTTAGGCACCTTCAACAACTGCTTAA 197
BrnsLtpY.2 CCCTGAGTSCCTAGAGSSTGGCAACCTATGCTTATGCTGAAAGSAGG...TGTTCTTSTCGAASAGSACTSCCTCCCAACCGCCGAGTGCTCCGCTG 179

BrnsLtpY.1 GTTCAAGACTCCAGGATCGAAGAAGTACAGCAGGGSACTTGACACTTAAGAGAGTTTCGAAATGCATASAGATGATCGAAATACAGATCATCTTCTCC 297
BrnsLtpY.2 GTTCAAGTACCGCCGTGAAAGGCTTASAGCAGGAGSACTTCCGGTCTATSSA...GTTTTCACCAACAGCCTTTCAAGCAATCAAGCAAGCGTTT 277

```

**BrnsLtpY.2 RP**

**BrnsLtpY.1 RP**

```

BrnsLtpY.1 TTTTGGATCCCCGANTCAAAGTCTTCCCTCCCTTTGTTCTGCTCCGCTCCCTTTCTCATCTCTGTGAATGGAGTGTCTCACTTTASAAAGTGA 397
BrnsLtpY.2 TGGTCTCTCTGACCACTGCTCATTTCGGCGGTGGCTTCCCATTTCAAAAGAACAAAGSAGCGCTTGT...AAGCTCATTCCTTTCACCAACTCTTT 374

BrnsLtpY.1 AGGAACCTCGACGCTGAAAAAGTAAACTAG 426
BrnsLtpY.2 ..... 375

```
